# Supplementary material for: Non-responsiveness to cardioprotection by ischaemic preconditioning in Ossabaw minipigs with genetic predisposition to, but without the phenotype of the metabolic syndrome
Source: Springer Nature journal article supplement (doi:10.1007/s00395-022-00965-0), 2022-11-11

## Supplemental Tables and Figures

### **Non-responsiveness to cardioprotection by ischaemic preconditioning in Ossabaw minipigs with genetic predisposition to, but without the phenotype of the metabolic syndrome**

Petra Kleinbongard<sup>1</sup>, PhD; Helmut Raphael Lieder<sup>1</sup>, MD; Andreas Skyschally<sup>1</sup>, PhD; Mouhamad Alloosh<sup>2</sup>, MD; Axel Gödecke<sup>3</sup>, PhD; Sven Rahmann<sup>4</sup>, PhD; Michael Sturek<sup>2</sup>, PhD; Gerd Heusch<sup>1</sup>, MD

<sup>1</sup>Institute for Pathophysiology, West German Heart and Vascular Center, University of Essen Medical School, University of Duisburg-Essen, Essen, Germany; <sup>2</sup>Department of Anatomy, Cell Biology, & Physiology, Indiana University School of Medicine, Indianapolis, USA; <sup>3</sup>Institute for Cardiovascular Physiology, University Hospital and Heinrich-Heine University, Düsseldorf, Germany; <sup>4</sup>Algorithmic Bioinformatics, Center for Bioinformatics and Department of Computer Science, Saarland University, Saarbrücken, Germany

Short title: Lack of cardioprotection in Ossabaw minipigs

Supplemental Table 1

| accession number | pig strain        | pig name / ID(#)   | sex | genotype | reads      | Gbp     | Cov.   | T  |
|------------------|-------------------|--------------------|-----|----------|------------|---------|--------|----|
| SAMN28202074     | Ossabaw minipig   | Todd, #P2110       | m   | I/I      | 750275394  | 225.083 | 87.2x  | 15 |
| SAMN28202075     | Ossabaw minipig   | Vladir, #P2536     | m   | V/V      | 711942413  | 213.583 | 82.8x  | 14 |
| SAMN28202076     | Ossabaw minipig   | Valencia, #P2540   | f   | V/V      | 1055076183 | 316.523 | 122.7x | 23 |
| SAMN28202077     | Ossabaw minipig   | Anarietta, #P2638  | f   | I/I      | 672374388  | 201.712 | 78.2x  | 14 |
| SAMN28202078     | Ossabaw minipig   | Kangaroo, #P2781   | f   | I/I      | 649794528  | 194.938 | 75.6x  | 14 |
| SAMN28202079     | Ossabaw minipig   | Valor, #P3057      | m   | V/V      | 766072312  | 229.822 | 89.1x  | 16 |
| SAMN28202080     | Ossabaw minipig   | Novak, #P3080      | m   | I/I      | 642446760  | 192.734 | 74.7x  | 13 |
| SAMN28202081     | Ossabaw minipig   | Valentine, #P3247A | f   | V/V      | 972190118  | 291.657 | 113.0x | 22 |
| ERR2744277       | Göttingen minipig | -                  | f   | -        | 183937614  | 36.788  | 14.26x | 3  |
| ERR2744278       | Göttingen minipig | -                  | f   | -        | 195476661  | 39.095  | 15.15x | 3  |
| ERR2744279       | Göttingen minipig | -                  | f   | -        | 199177973  | 39.836  | 15.44x | 4  |
| ERR2744280       | Göttingen minipig | -                  | f   | -        | 195578756  | 39.116  | 15.16x | 4  |
| ERR2744281       | Göttingen minipig | -                  | f   | -        | 193841291  | 38.768  | 15.03x | 4  |
| ERR2744282       | Göttingen minipig | -                  | f   | -        | 191300443  | 38.260  | 14.83x | 3  |
| ERR2744283       | Göttingen minipig | -                  | f   | -        | 212701827  | 42.540  | 16.49x | 4  |
| ERR2744284       | Göttingen minipig | -                  | f   | -        | 205724225  | 41.145  | 15.95x | 3  |
| ERR2744285       | Göttingen minipig | -                  | f   | -        | 207048949  | 41.410  | 16.05x | 4  |
| ERR2744286       | Göttingen minipig | -                  | f   | -        | 184378852  | 36.876  | 14.29x | 3  |

f: female pigs; m: male pigs; V/V: pigs with homozygous valine in the  $\gamma$ -subunit of the adenosine monophosphate-activated protein kinase; I/I: pigs with homozygous isoleucine in the  $\gamma$ -subunit of the adenosine monophosphate-activated protein kinase

Details to genome sequences of Ossabaw minipigs and Göttingen minipigs. For each individual pig, the accession number, name and ID number (if assigned), sex, genotype, the number of sequenced reads (length 2x150 for Ossabaw minipigs, 2x100 for Göttingen minipigs), the total number of sequenced giga-basepairs (Gbp), the average genome coverage (Cov.) with an assumed genome size of 2.58 Gbp, and k-mer frequency threshold values (T) are given.

Ossabaw minipig genome data are made available at the National Library of Medicine, Sequence Read Archive, Bioproject PRJNA837405. Göttingen minipig genome data were retrieved from the European Nucleotide Archive; project number PRJEB27654.

**Supplemental Table 2**

| a) | 0        | 1        | 2        | 3        | 4        | 5        | 6        | 7        | 8        | 9         | 10         |
|----|----------|----------|----------|----------|----------|----------|----------|----------|----------|-----------|------------|
| 0  | 0        | 57035093 | 38862945 | 35151135 | 31553520 | 27805367 | 26773156 | 25759814 | 25295282 | 26150470  | 47372397   |
| 1  | 24320458 | 2098980  | 1847970  | 1645666  | 1656652  | 1634977  | 1662051  | 1782188  | 1877735  | 2113077   | 4185046    |
| 2  | 19896290 | 2401276  | 2274538  | 2029623  | 1966666  | 1902474  | 2017209  | 2213450  | 2598534  | 2809455   | 6142604    |
| 3  | 22187746 | 3390402  | 2560092  | 2697499  | 2624967  | 2618272  | 2514164  | 2741767  | 2955843  | 3588000   | 7899336    |
| 4  | 40030623 | 5920134  | 4596084  | 4698928  | 4726133  | 4517352  | 4412569  | 4637822  | 5341669  | 6483151   | 14515516   |
| 5  | 15495903 | 2804766  | 2389608  | 2496686  | 2308956  | 2362817  | 2493170  | 2668560  | 2977852  | 3770057   | 9348315    |
| 6  | 16938364 | 3414571  | 2798878  | 2640339  | 2814446  | 2833028  | 3070524  | 3411276  | 3703636  | 4134549   | 10414518   |
| 7  | 21525984 | 5090591  | 4449718  | 4582449  | 4508965  | 4649142  | 4887736  | 5479092  | 6124176  | 8269817   | 23764923   |
| 8  | 81743088 | 32774421 | 31892905 | 34336990 | 37313575 | 41191431 | 46995021 | 58605678 | 81046297 | 166366800 | 1382889342 |

| b) | 0        | 1        | 2        | 3        | 4        | 5        | 6        | 7        | 8        | 9         | 10         |
|----|----------|----------|----------|----------|----------|----------|----------|----------|----------|-----------|------------|
| 0  | 0        | 58450462 | 40003471 | 36373574 | 32758807 | 28901931 | 27974797 | 27150061 | 26817936 | 28010761  | 51120295   |
| 1  | 41468298 | 5424360  | 4542564  | 4443309  | 4482620  | 4488570  | 4200238  | 4393166  | 4790767  | 5484413   | 12091093   |
| 2  | 50681098 | 8454788  | 6850340  | 6752200  | 6697011  | 6475727  | 6654084  | 7296053  | 8248667  | 9827656   | 22479232   |
| 3  | 33867109 | 7600528  | 6290026  | 6377178  | 6236971  | 6425026  | 6829664  | 7494218  | 8239265  | 10289315  | 26444078   |
| 4  | 93576519 | 35000096 | 33986337 | 36333054 | 39298471 | 43223606 | 49166817 | 60966149 | 83824389 | 170073231 | 1394397299 |

a) Number of  $k$ -mers that belong to  $i$  out of 8 Ossabaw minipig individuals (row number  $i$ ) and  $j$  out of 10 Göttingen minipig individuals (column number  $j$ ) for all pairs  $0 \leq i \leq 8$  and  $0 \leq j \leq 10$ .

b) Number of  $k$ -mers that belong to  $i$  out of 4 female Ossabaw minipig individuals (row number  $i$ ) and  $j$  out of 10 female Göttingen minipig individuals (column number  $j$ ) for all pairs  $0 \leq i \leq 4$  and  $0 \leq j \leq 10$ .

Supplemental Table 3

| <i>Sus scrofa</i> reference genome data     | Sscrofa11.1; RefSeq: GCF_000003025.6*                                                                                                                                                                                                                                                                                |                                                                                                                                                                                                             |                                                                                                                                                                                                                                                                                                                           |
|---------------------------------------------|----------------------------------------------------------------------------------------------------------------------------------------------------------------------------------------------------------------------------------------------------------------------------------------------------------------------|-------------------------------------------------------------------------------------------------------------------------------------------------------------------------------------------------------------|---------------------------------------------------------------------------------------------------------------------------------------------------------------------------------------------------------------------------------------------------------------------------------------------------------------------------|
| <b>Annotation file</b>                      | GFF file, gene interval annotations<br><a href="https://ftp.ncbi.nlm.nih.gov/genomes/all/GCF/000/003/025/GCF_000003025.6_Sscrofa11.1/GCF_000003025.6_Sscrofa11.1_genomic.gff.gz">https://ftp.ncbi.nlm.nih.gov/genomes/all/GCF/000/003/025/GCF_000003025.6_Sscrofa11.1/GCF_000003025.6_Sscrofa11.1_genomic.gff.gz</a> | protein table, download at<br><a href="https://www.ncbi.nlm.nih.gov/genome/browse/#/proteins/84/317145%7CSus%20scrofa/">https://www.ncbi.nlm.nih.gov/genome/browse/#/proteins/84/317145%7CSus%20scrofa/</a> | GFF file, exon annotations for each gene<br><a href="https://ftp.ncbi.nlm.nih.gov/genomes/all/GCF/000/003/025/GCF_000003025.6_Sscrofa11.1/GCF_000003025.6_Sscrofa11.1_genomic.gff.gz">https://ftp.ncbi.nlm.nih.gov/genomes/all/GCF/000/003/025/GCF_000003025.6_Sscrofa11.1/GCF_000003025.6_Sscrofa11.1_genomic.gff.gz</a> |
| <b>sequence interval type</b>               | total gene interval                                                                                                                                                                                                                                                                                                  | from first to last coding base (including introns)                                                                                                                                                          | exon intervals                                                                                                                                                                                                                                                                                                            |
| <b>total number of annotated sequences</b>  | 25875                                                                                                                                                                                                                                                                                                                | 19558                                                                                                                                                                                                       | 25424                                                                                                                                                                                                                                                                                                                     |
| <b>LOCxxxx sequences</b>                    | 8711                                                                                                                                                                                                                                                                                                                 | 3229                                                                                                                                                                                                        | 8705                                                                                                                                                                                                                                                                                                                      |
| <b>MIRxxxx sequences</b>                    | 307                                                                                                                                                                                                                                                                                                                  | 0                                                                                                                                                                                                           | 307                                                                                                                                                                                                                                                                                                                       |
| <b>TRNAxxxx sequences</b>                   | 459                                                                                                                                                                                                                                                                                                                  | 11                                                                                                                                                                                                          | 58                                                                                                                                                                                                                                                                                                                        |
| <b>sequences with assigned protein name</b> | 16398                                                                                                                                                                                                                                                                                                                | 16318                                                                                                                                                                                                       | 16354                                                                                                                                                                                                                                                                                                                     |

\* representative reference genome assembly from NCBI for *Sus scrofa*, submitted by "The Swine Genome Sequencing Consortium (SGSC)"; LOCxxxx: annotated protein-coding sequences without assigned protein name; MIRxxxx: sequences annotated as micro RNAs; TRNAxxxx: sequences annotated as transfer RNAs; LOCxxxx, MIRxxxx, and TRNAxxxx sequences were excluded in the numbers reported from Ossabaw minipigs and Göttingen minipigs.

| Göttingen minipig genome data                                                                  | European Nucleotide Archive (project number PRJEB27654, accession numbers ERR2744277 - ERR2744286)<br>data from 10 ♀ Göttingen minipigs |                                |       |                                        |                                |       |
|------------------------------------------------------------------------------------------------|-----------------------------------------------------------------------------------------------------------------------------------------|--------------------------------|-------|----------------------------------------|--------------------------------|-------|
| Ossabaw minipig genome data                                                                    | NCBI Sequence Read Archive (project number PRJNA837405, accession numbers SAMN2820274 – SAMN2820281)                                    |                                |       |                                        |                                |       |
|                                                                                                | data from 4 ♀ Ossabaw minipigs                                                                                                          |                                |       | data from 4 ♀ and 4 ♂ Ossabaw minipigs |                                |       |
| <b>sequence frame type</b>                                                                     | total gene                                                                                                                              | from first to last coding base | exons | total gene                             | from first to last coding base | exons |
| <b>sequences with altered bp in Ossabaw minipigs</b>                                           | 11522                                                                                                                                   | 10517                          | 6858  | 8040                                   | 7220                           | 3873  |
| <b>sequences with variants in Ossabaw minipigs</b>                                             | 13217                                                                                                                                   | 12139                          | 7821  | 10485                                  | 9505                           | 4673  |
| <b>sequences with altered bp in Ossabaw minipigs and zero altered bp in Göttingen minipigs</b> | 726                                                                                                                                     | 1154                           | 906   | 380                                    | 604                            | 480   |
| <b>sequences with variants in Ossabaw minipigs and zero variants in Göttingen minipigs</b>     | 261                                                                                                                                     | 474                            | 563   | 126                                    | 227                            | 294   |

bp: base pairs

More than 10.000 altered bp sequences were identified in the 4 female Ossabaw minipigs, slightly over 8.000 also in the larger cohort of 4 female and 4 castrated male Ossabaw minipigs. To contrast differences between the Ossabaw minipigs on the one hand and Göttingen minipigs and *Sus scrofa* on the other hand, we focused on sequences with variants in the exons of protein-encoding genes.

Supplemental Table 4

| antibody against                                | primary antibody  | Cell Signaling catalogue number | dilution | incubation       | secondary antibody    | Li-COR (1) Cell Signaling (2) catalogue number | dilution | incubation |
|-------------------------------------------------|-------------------|---------------------------------|----------|------------------|-----------------------|------------------------------------------------|----------|------------|
| AKT <sub>ser473</sub> *                         | rabbit polyclonal | 9271                            | 1:150    | overnight at 4°C | goat anti-rabbit IgG  | (1) 926-32211                                  | 1:4000   | 2 h at RT  |
| AKT*                                            | mouse monoclonal  | 58295                           | 1:1000   | 2 h at RT        | goat anti-mouse IgG   | (1) 926-68070                                  | 1:10000  | 1 h at RT  |
| AMPK <sub>thr172</sub> #                        | rabbit monoclonal | 2535                            | 1:500    | overnight at 4°C | goat anti-rabbit IgG  | (1) 926-32211                                  | 1:10000  | 1h at RT   |
| AMPK#                                           | mouse monoclonal  | 2793                            | 1:500    | 1 h at RT        | goat anti-mouse IgG   | (1) 926-68070                                  | 1:10000  | 1h at RT   |
| AS160 <sub>thr642</sub> *                       | rabbit monoclonal | 8881                            | 1:500    | overnight at 4°C | goat anti-rabbit IgG  | (2) 7074                                       | 1:4000   | 1h at RT   |
| AS160*                                          | rabbit monoclonal | 2670                            | 1:500    | overnight at 4°C | goat anti-rabbit IgG  | (2) 7074                                       | 1:5000   | 1h at RT   |
| ERK1/2 <sub>thr202-tyr204/thr185-tyr187</sub> # | rabbit polyclonal | 9101                            | 1:500    | overnight at 4°C | goat anti-rabbit IgG  | (1) 926-32211                                  | 1:20000  | 2 h at RT  |
| ERK#                                            | mouse monoclonal  | 4696                            | 1:500    | 1 h at RT        | goat anti-mouse IgG   | (1) 926-68070                                  | 1:10000  | 2 h at RT  |
| PTEN <sub>ser380/thr382/383</sub>               | rabbit monoclonal | 9549                            | 1:500    | overnight at 4°C | goat anti-rabbit IgG  | (1) 926-32211                                  | 1:5000   | 1h at RT   |
| PTEN                                            | mouse monoclonal  | 14642                           | 1:500    | overnight at 4°C | goat anti-mouse IgG   | (1) 926-68070                                  | 1:5000   | 1h at RT   |
| STAT3 <sub>tyr705</sub> *                       | mouse monoclonal  | 9138                            | 1:250    | overnight at 4°C | goat anti-mouse IgG1  | (1) 926-32350                                  | 1:5000   | 1 h at RT  |
| STAT3*                                          | mouse monoclonal  | 9139                            | 1:2000   | overnight at 4°C | goat anti-mouse IgG2a | (1) 926-68051                                  | 1:10000  | 2 h at RT  |
| STAT5 <sub>tyr694</sub> *                       | rabbit monoclonal | 4322                            | 1:500    | overnight at 4°C | goat anti-rabbit IgG  | (2) 7074                                       | 1:4000   | 1h at RT   |
| STAT5*                                          | rabbit monoclonal | 94205                           | 1:500    | overnight at 4°C | goat anti-rabbit IgG  | (2) 7074                                       | 1:4000   | 1h at RT   |

\*sequential incubation of primary and secondary antibodies; # sequential incubation of primary antibodies for phosphorylated and total form of the protein, respectively, and simultaneous incubation of the respective secondary antibodies; AKT: protein kinase B; AMPK: AMP-activated protein kinase; AS160: 160 kDa substrate of the AKT Ser/Thr kinase; ERK: mitogen extracellular-regulated-kinase; PTEN: phosphatase and tensin homolog; STAT: signal transducer and activator of transcription; RT: room temperature

Protein phosphorylation sites, ordering numbers of primary and secondary antibodies, antibodies working concentration and antibody incubation times.

**Supplemental Table 5**

| protein | annotated sequence | sequence length | Ossabaw minipig  |                | Göttingen minipig |                |
|---------|--------------------|-----------------|------------------|----------------|-------------------|----------------|
|         |                    |                 | altered bp / Mbp | variants / Mbp | altered bp / Mbp  | variants / Mbp |
| AKT2    | AKT2               | 8423            | 0                | 119            | 163362            | 3324           |
| AKT3    | AKT3               | 7945            | 4405             | 2140           | 45563             | 755            |
| AMPK    | PRKAG3             | 2022            | 0                | 0              | 106825            | 7418           |
| ERK1    | MAPK3              | 1844            | 542              | 542            | 419197            | 1085           |
| ERK2    | MAPK1              | 4184            | 239              | 239            | 163002            | 239            |
| STAT3   | STAT3              | 2473            | 0                | 0              | 46098             | 1213           |
| STAT5A  | STAT5A             | 3835            | 0                | 0              | 56584             | 4954           |
| STAT5B  | STAT5B             | 5086            | 0                | 0              | 47975             | 1966           |

AKT: protein kinase B; AMPK: AMP-activated protein kinase; ERK: mitogen extracellular-regulated-kinase; STAT3: signal transducer and activator of transcription 3; STAT5: signal transducer and activator of transcription 5

Excerpt of supplemental data file "Altered base pairs and variants in Ossabaw minipigs and Göttingen minipigs.xlsx"; altered base pairs (bp) and variants, both normalised to 1 Mbp, in Ossabaw minipigs and Göttingen minipigs for the proteins AKT2, AKT3, AMPK, ERK1, ERK2, STAT3, STS5A, AND STAT5B which have been subjected to Western blot analysis for changes in phosphorylation during ischaemia/reperfusion with and without cardioprotection.

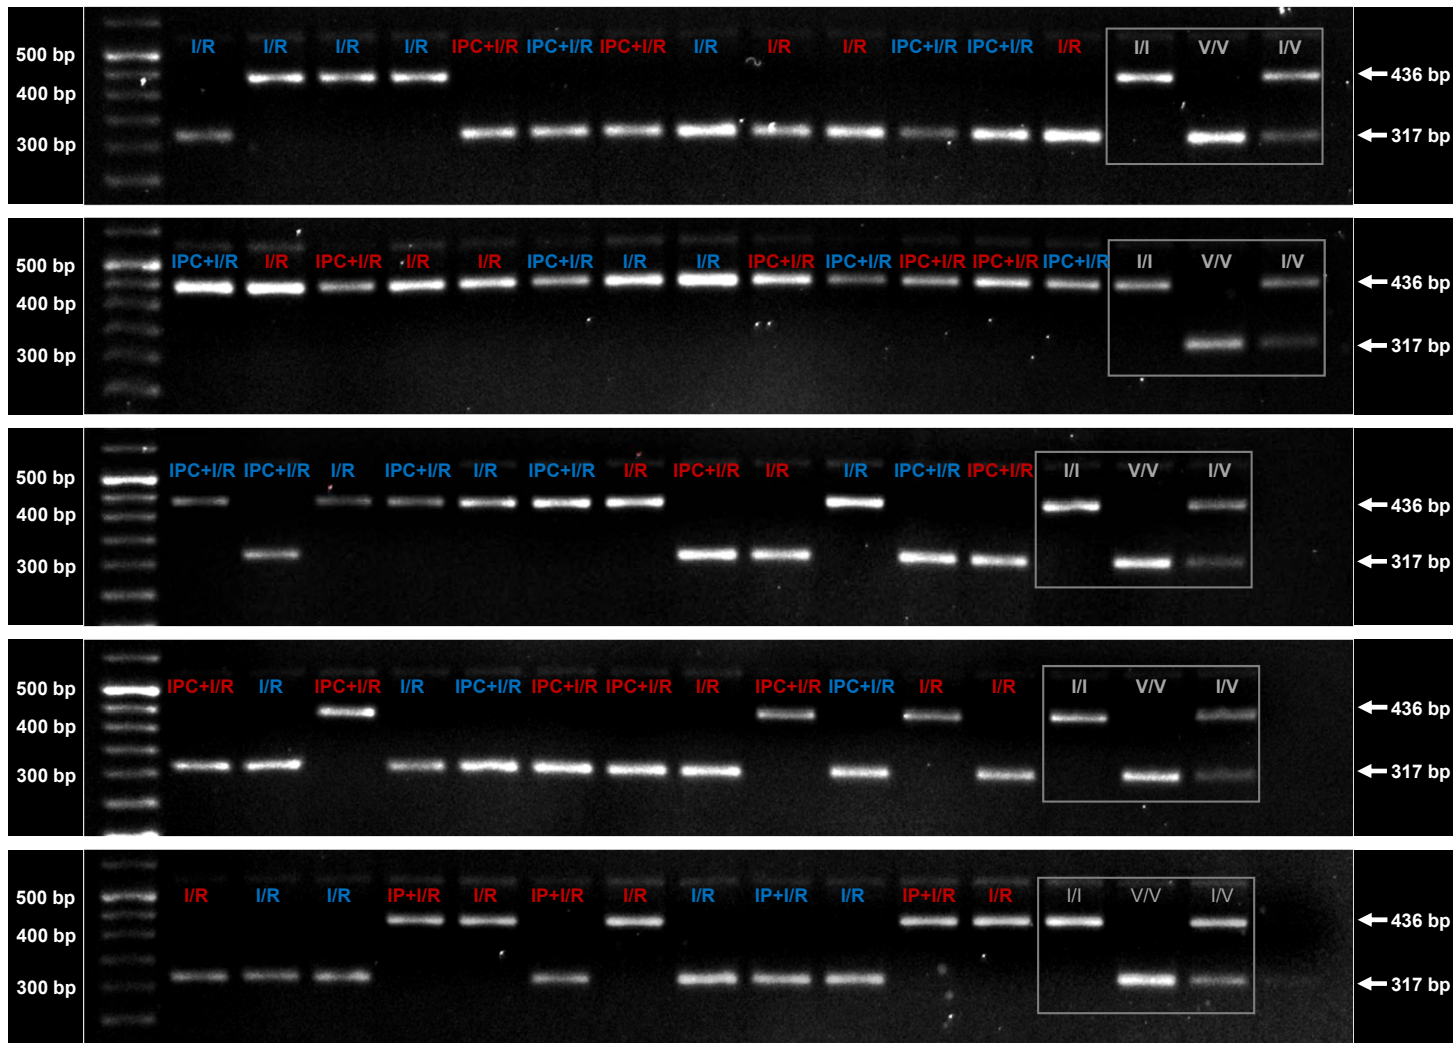

**Supplemental Figure 1.** Genotyping for the individual Ossabaw minipigs. Identification of homozygous point mutation resulting in a change from valine 199 to isoleucine in the  $\gamma$ -subunit of adenosine monophosphate-activated protein kinase (I/I) with the 436 bp product and of homozygous (V/V) valine 199 in the  $\gamma$ -subunit of adenosine monophosphate-activated protein kinase by the 317 bp product. Heterozygous Ossabaw minipigs (I/V) can be identified via both products 436 and 317 bp, respectively. On each gel, DNA of the 3 possible genotypes was loaded as reference (box on the right side, respectively). I/R=ischæmia/reperfusion; IPC+I/R=ischæmic preconditioning+ischæmia/reperfusion.

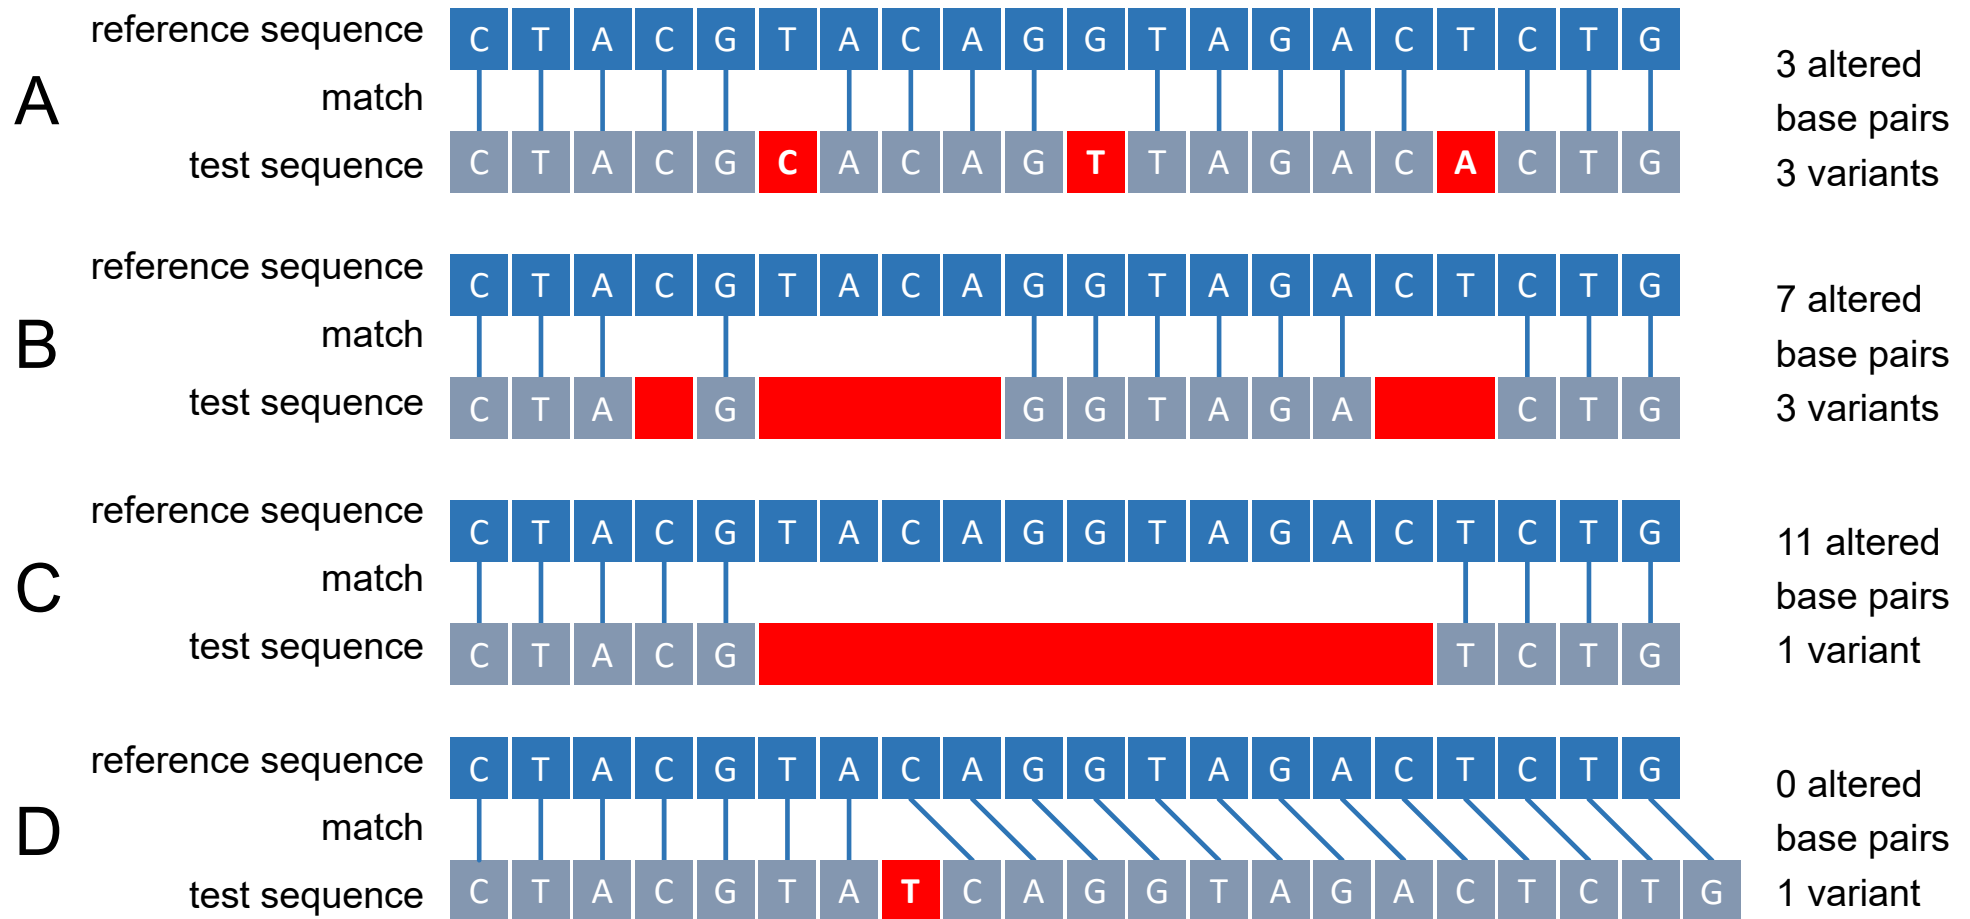

**Supplemental Figure 2.** Altered base pairs and variants: Altered base pairs can correspond to deleted or changed base pairs (A, B). A block of consecutive altered base pairs is called a variant (C). Another type of variant, not discovered by altered base pairs, but by reference k-mers which do not belong to the genomic content of one of the other strains, are insertions (D).



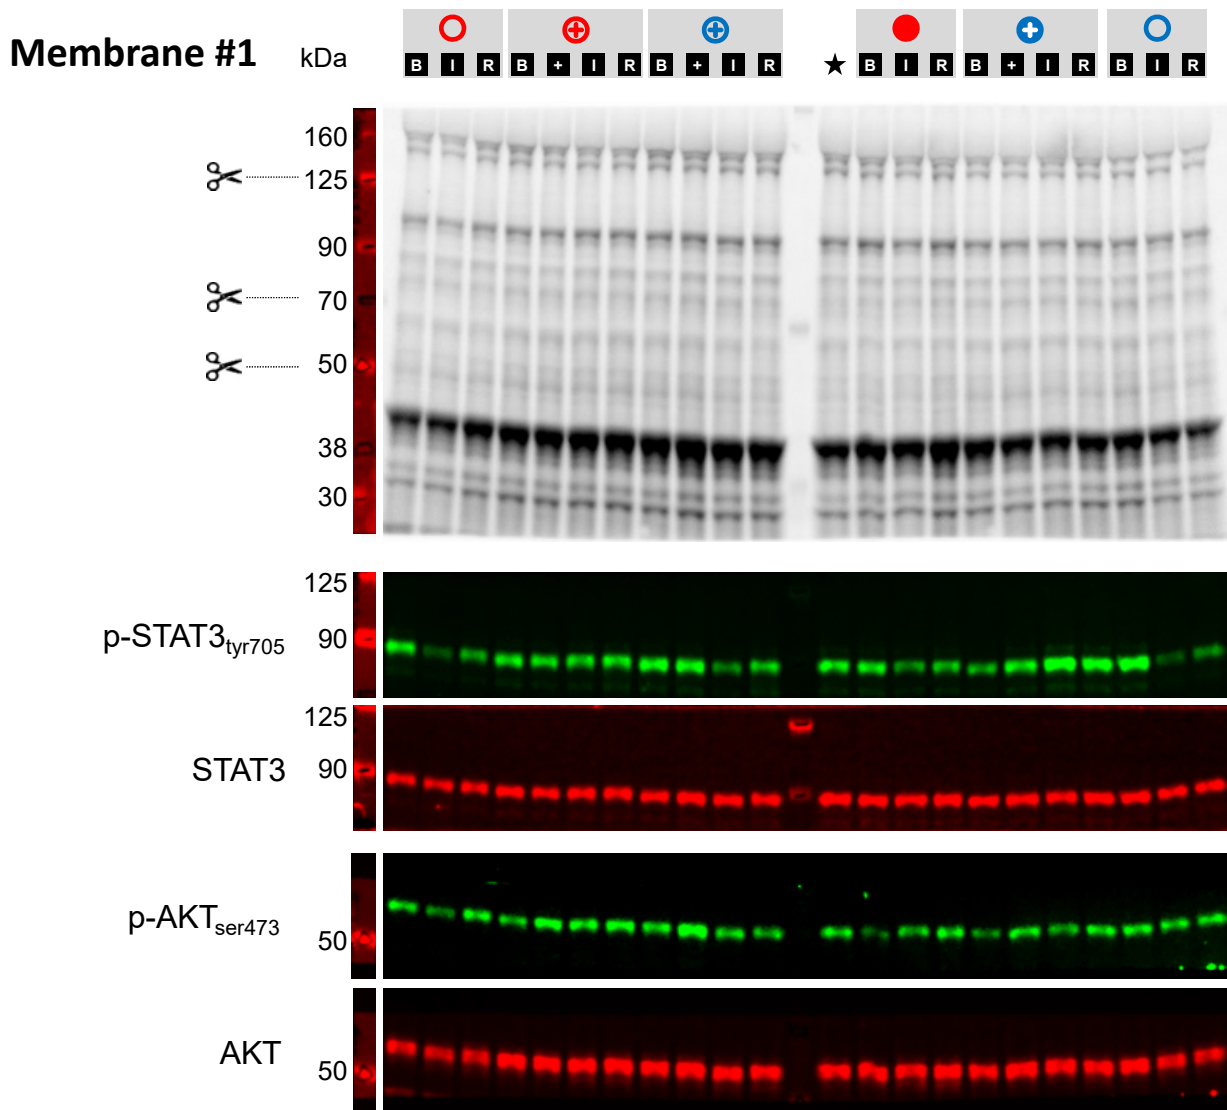

**Supplemental Figure 3.** Full unedited membranes for validation of equal protein loading; total protein is visualised by an ultraviolet light-induced fluorescence reaction of protein-tryptophan with tri-halocompounds. Dotted lines indicate where the membrane was cut horizontally. Marker proteins are visualised via red fluorescence/luminescence signals, respectively. The membrane sections are the areas chosen for signal intensity analysis.

Samples from females are indicated by red, from castrated males by blue symbols; V/V genotype (Ossabaw minipigs with homozygous valine in the  $\gamma$ -subunit of the adenosine monophosphate-activated protein kinase, AMPK) are indicated by filled symbols, and I/I genotype (Ossabaw minipigs with homozygous isoleucine in the  $\gamma$ -subunit of the AMPK) by open symbols.

*(legend continued on next page...)*

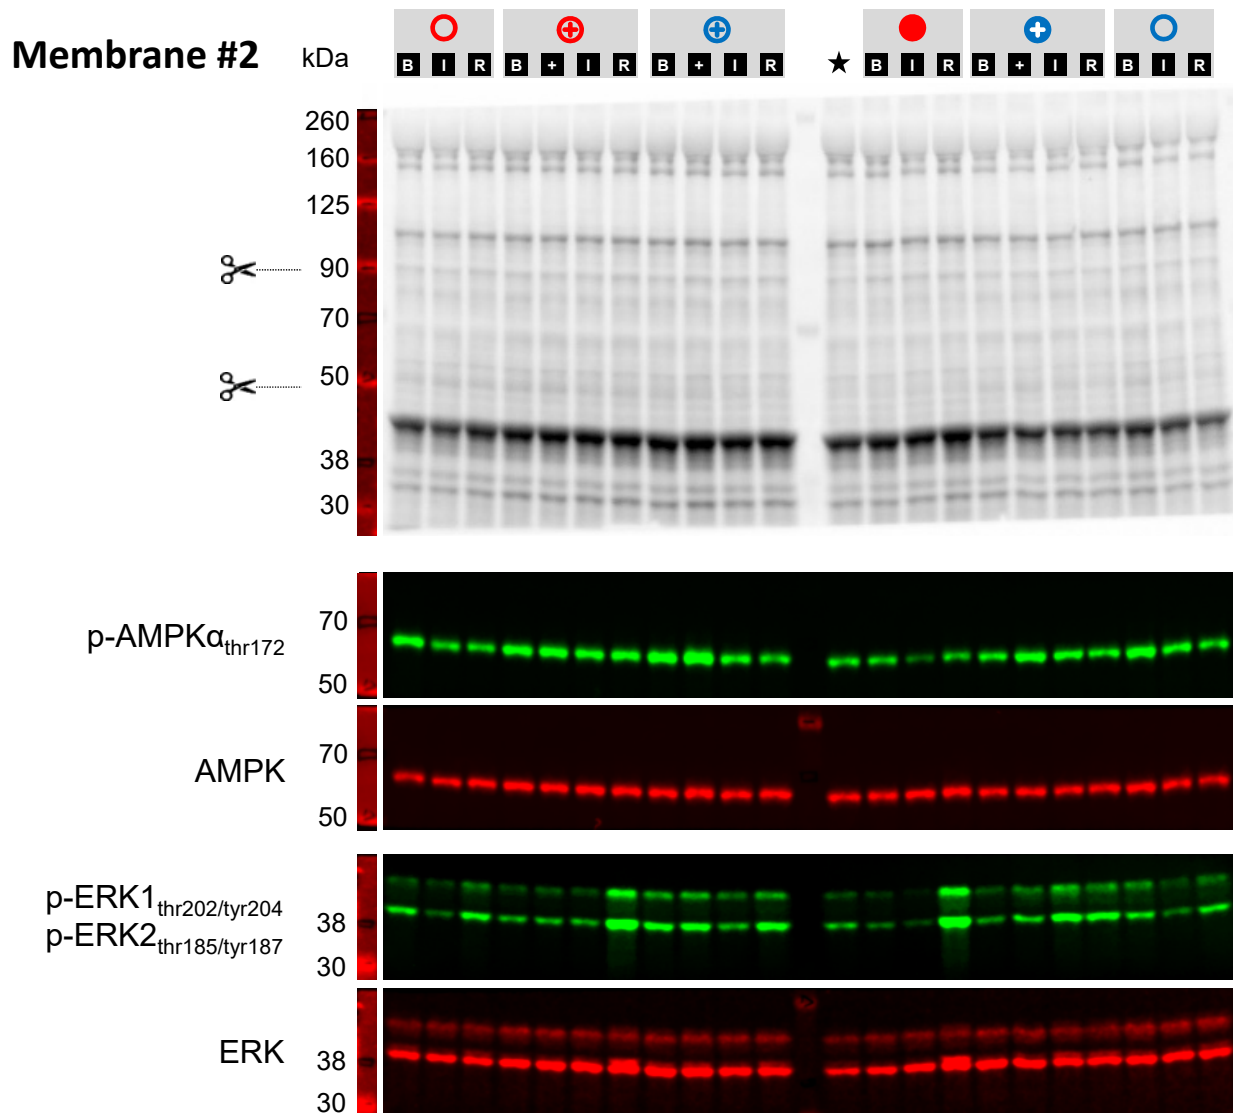

Individual samples are marked with B=baseline; +=after ischaemic preconditioning (IPC); I=55 min ischaemia; R=10 min reperfusion, respectively. ★ indicates the reference sample, which was loaded on each gel for subsequent data normalisation. \* indicates the left ventricular biopsy at I (55 min ischaemia) could not be taken due to ventricular fibrillation and intra-thoracic defibrillation. + on membranes #3 and #21 indicates a missing protein lysate; due to a very small left ventricular biopsy, resulting in low protein quantity. A white X above lanes in membranes #18 and #30 indicate fluorescence signal artefacts resulting in impossible signal quantification.

AKT: protein kinase b; AS160: 160 kDa substrate of the AKT Ser/Thr kinase; ERK: extracellular signal-regulated kinase; PTEN: phosphatase and tensin homolog; STAT: signal transducer and activator of transcription.

*(legend continued on next page...)*

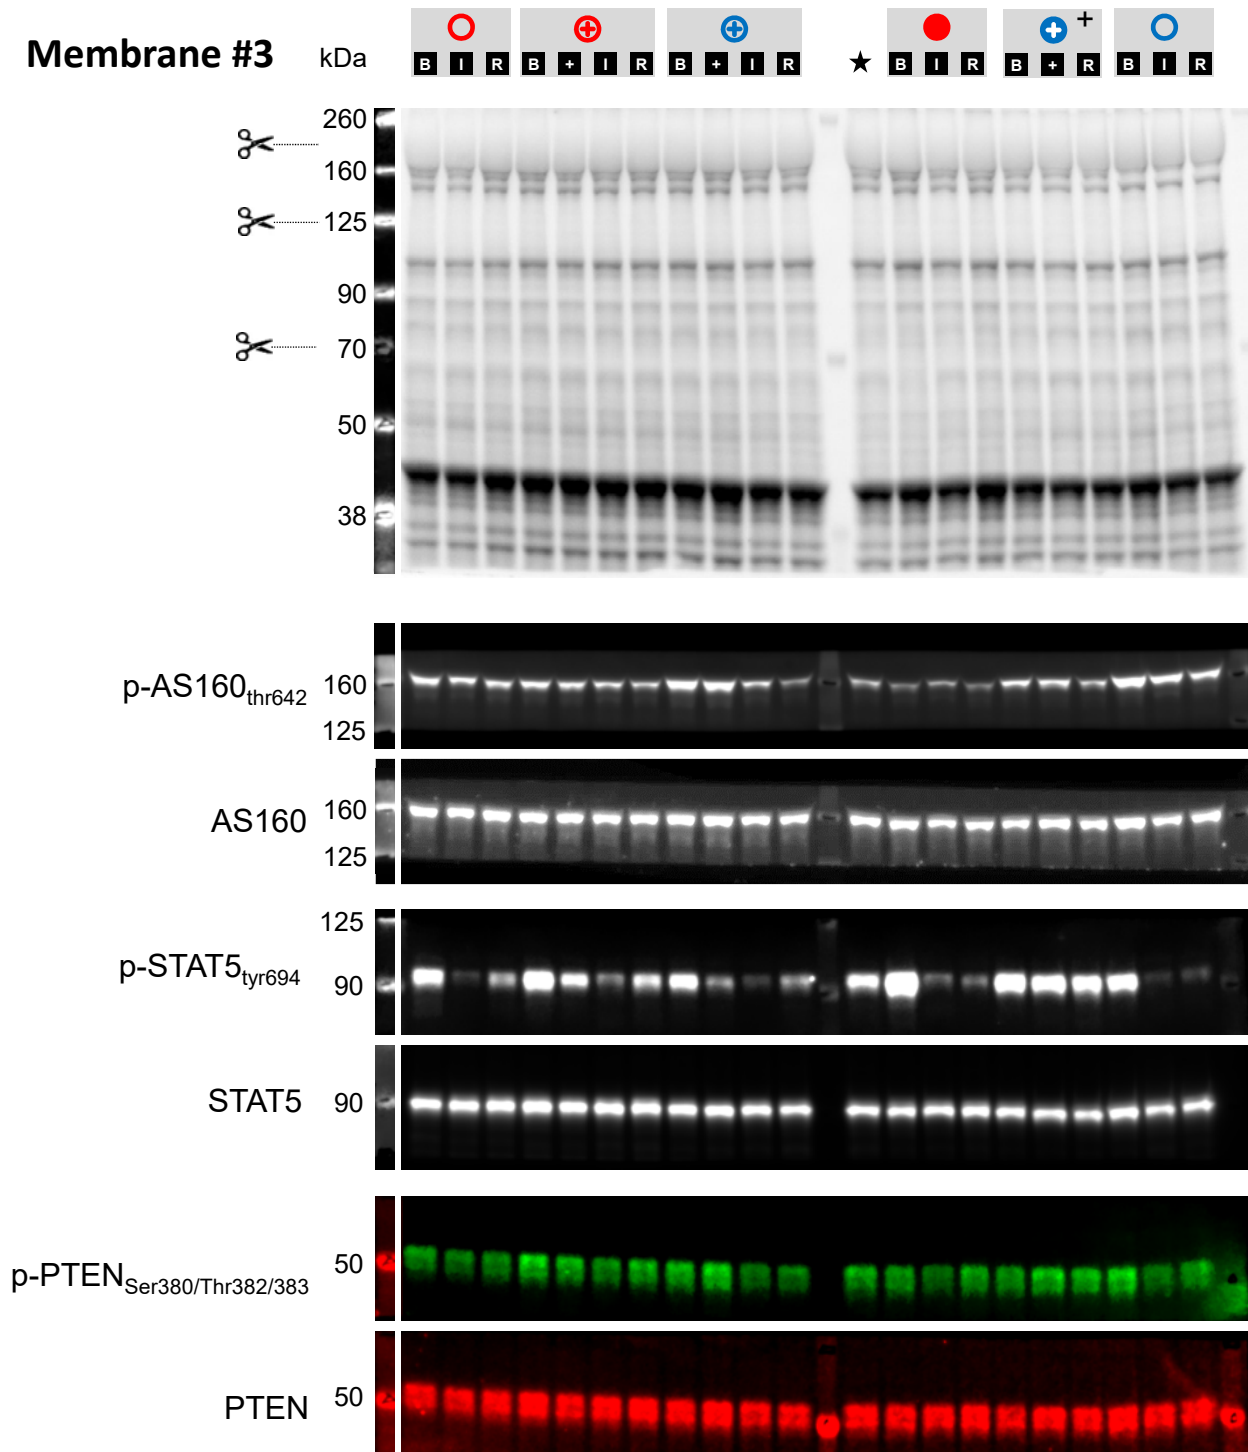

V/V females with ischaemia/reperfusion (I/R; n=7): myocardial biopsies at baseline (n=7), at I55 (n=6) and at R10 (n=7; n=6 for AS160, STAT5, and PTEN); V/V castrated males with I/R (n=8): myocardial biopsies at baseline (n=8), at I55 (n=8) and R10 (n=8); I/I females with I/R (n=8): myocardial biopsies at baseline (n=8), at I55 (n=7) and at R10 (n=8); I/I castrated males with I/R (n=7): myocardial biopsies at baseline (n=7), at I55 (n=5) and R10 (n=7); V/V females with IPC+I/R (n=8): myocardial biopsies at baseline (n=8), after IPC (n=8), at I55 (n=8) and at R10 (n=8);

(legend continued on next page...)

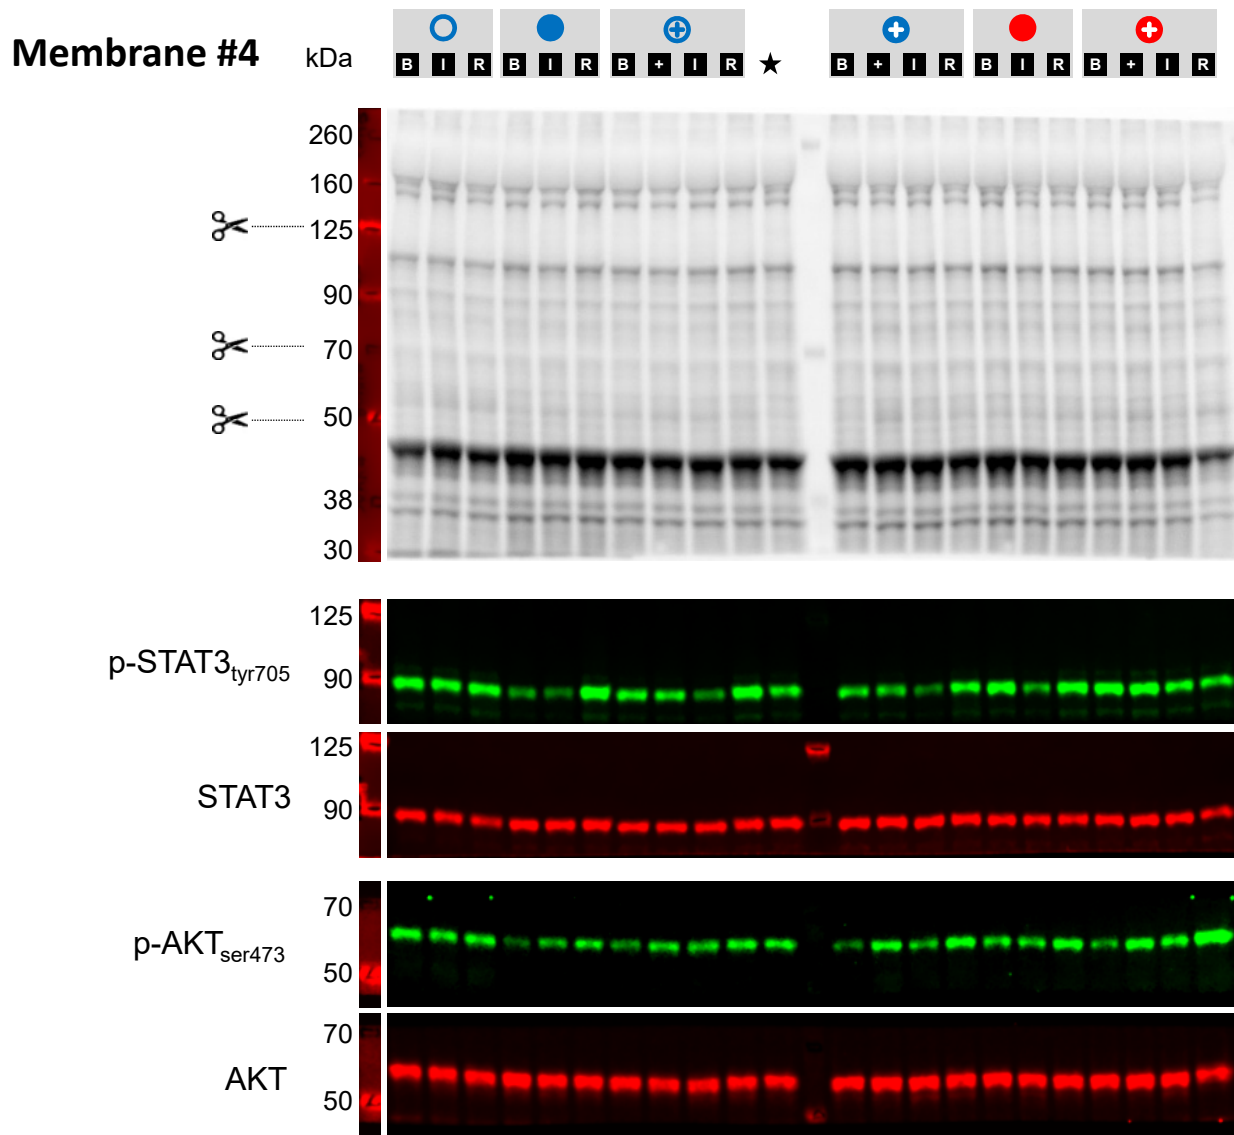

V/V castrated males with IPC+I/R (n=8): myocardial biopsies at baseline (n=8), after IPC (n=8), at I55 (n=7; n=6 for AS160, STAT5, and PTEN) and R10 (n=8); I/I females with IPC+I/R (n=7): myocardial biopsies at baseline (n=7), after IPC (n=7), at I55 (n=7) and at R10 (n=7); I/I castrated males with IPC+I/R (n=8): myocardial biopsies at baseline (n=8), after IPC (n=8), at I55 (n=8) and R10 (n=8).

**Membrane #5**

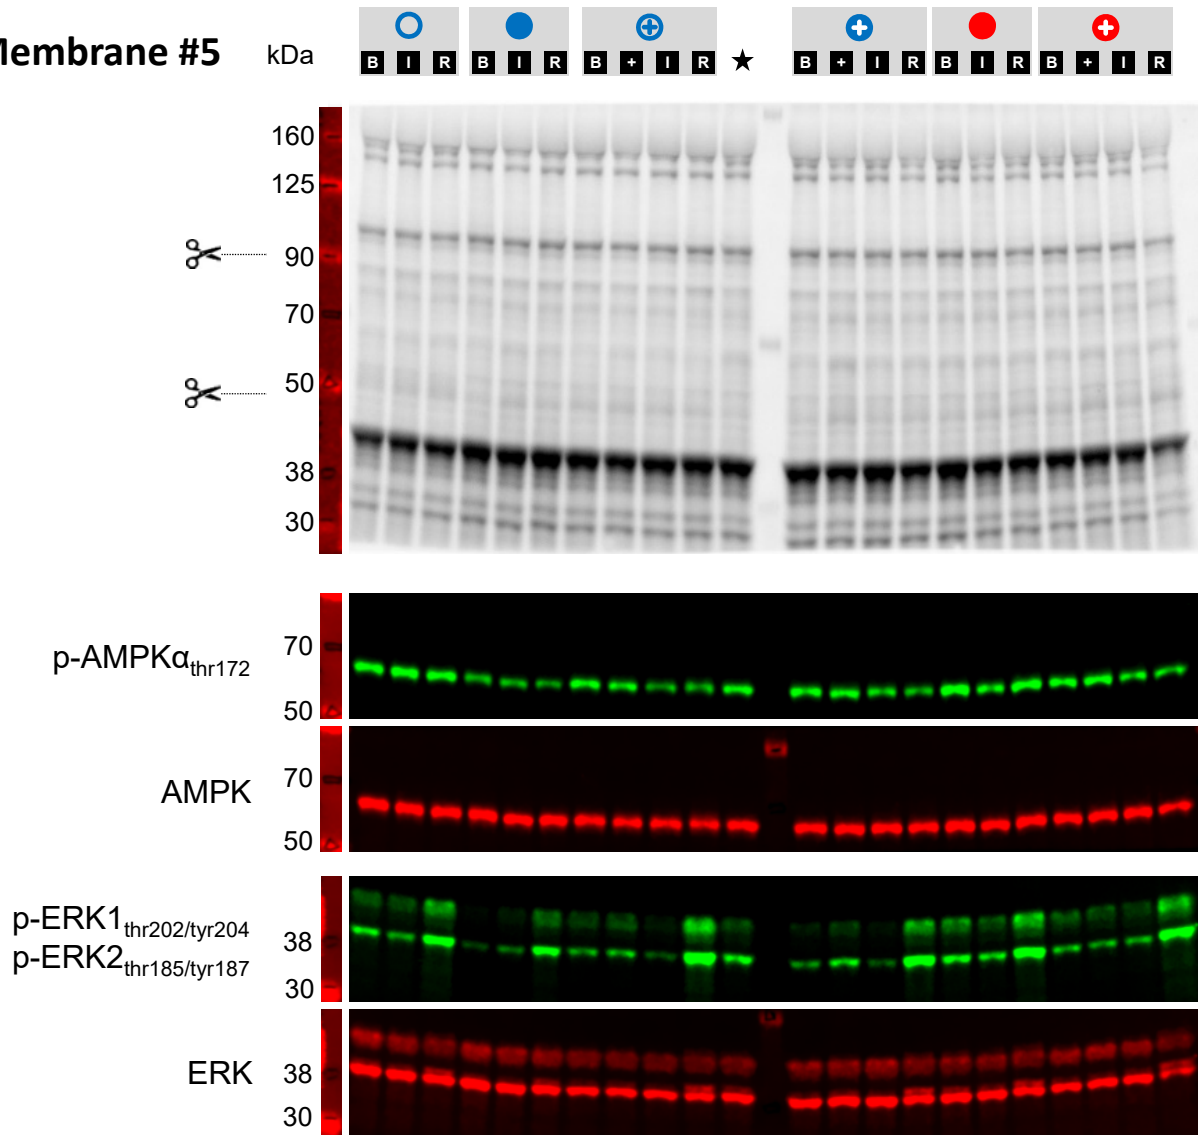

**Membrane #6**

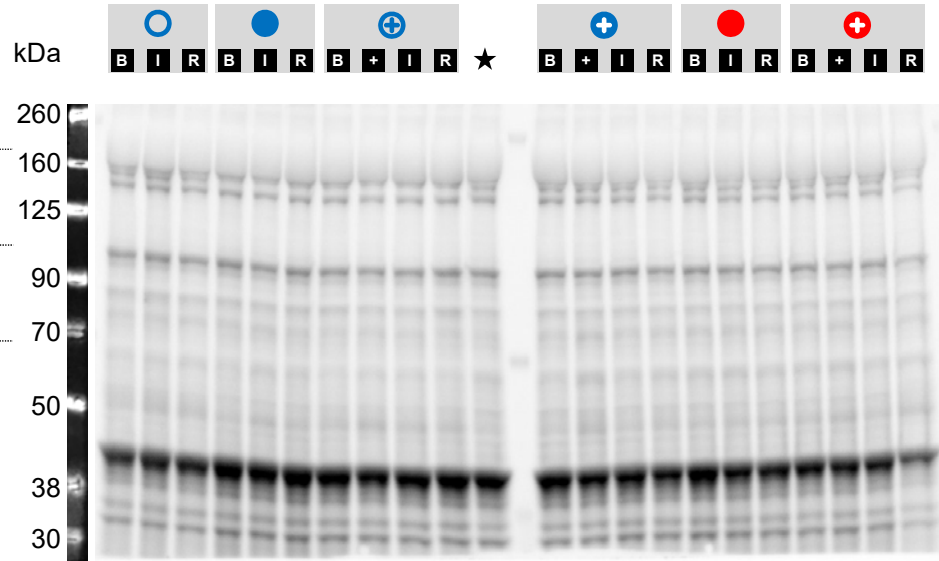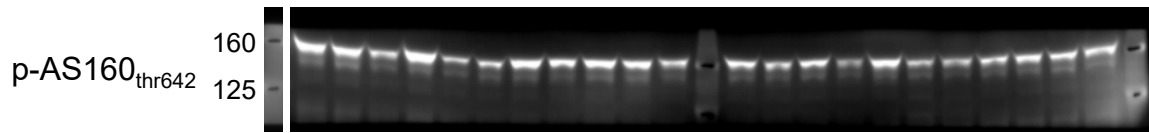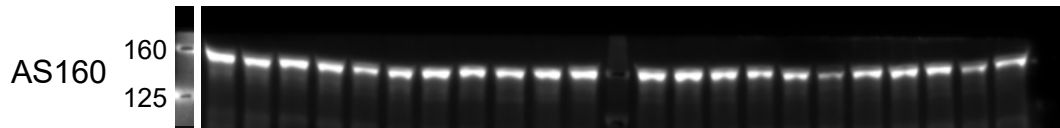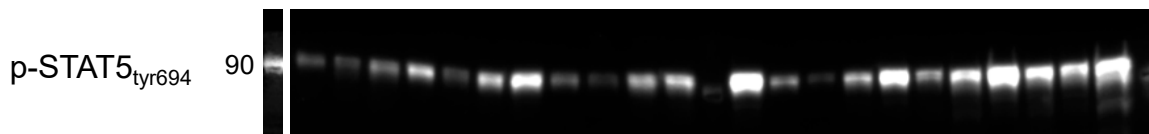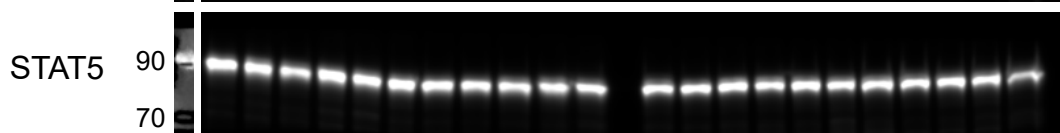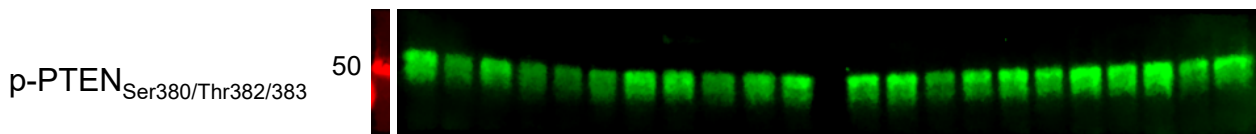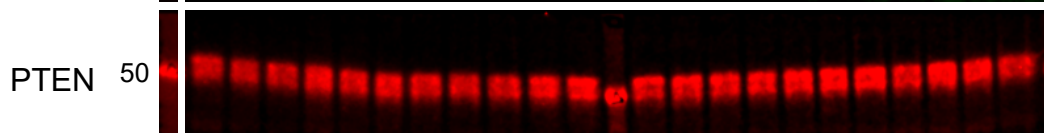

Membrane #7

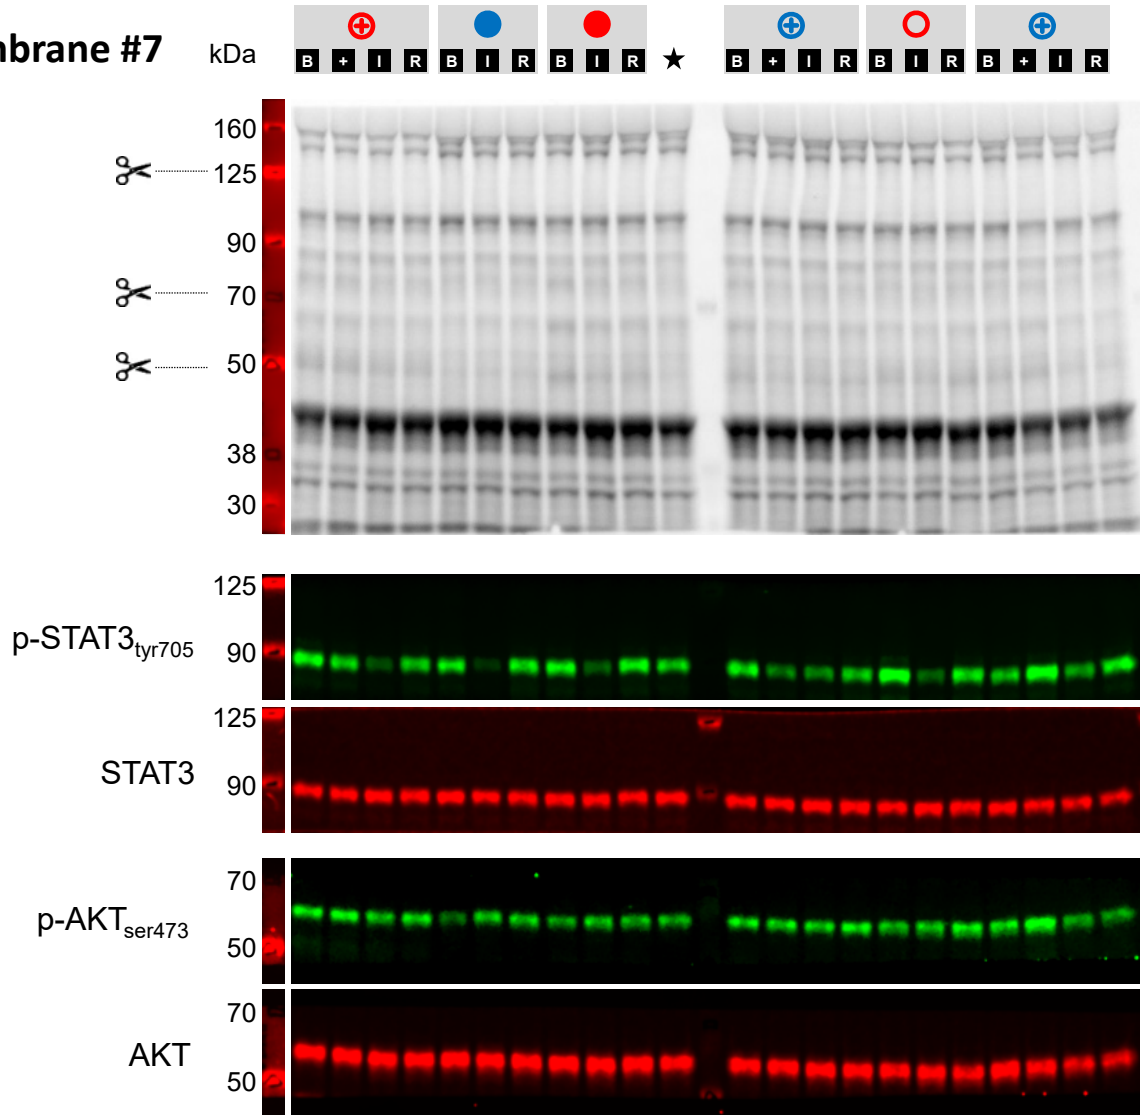

**Membrane #8**

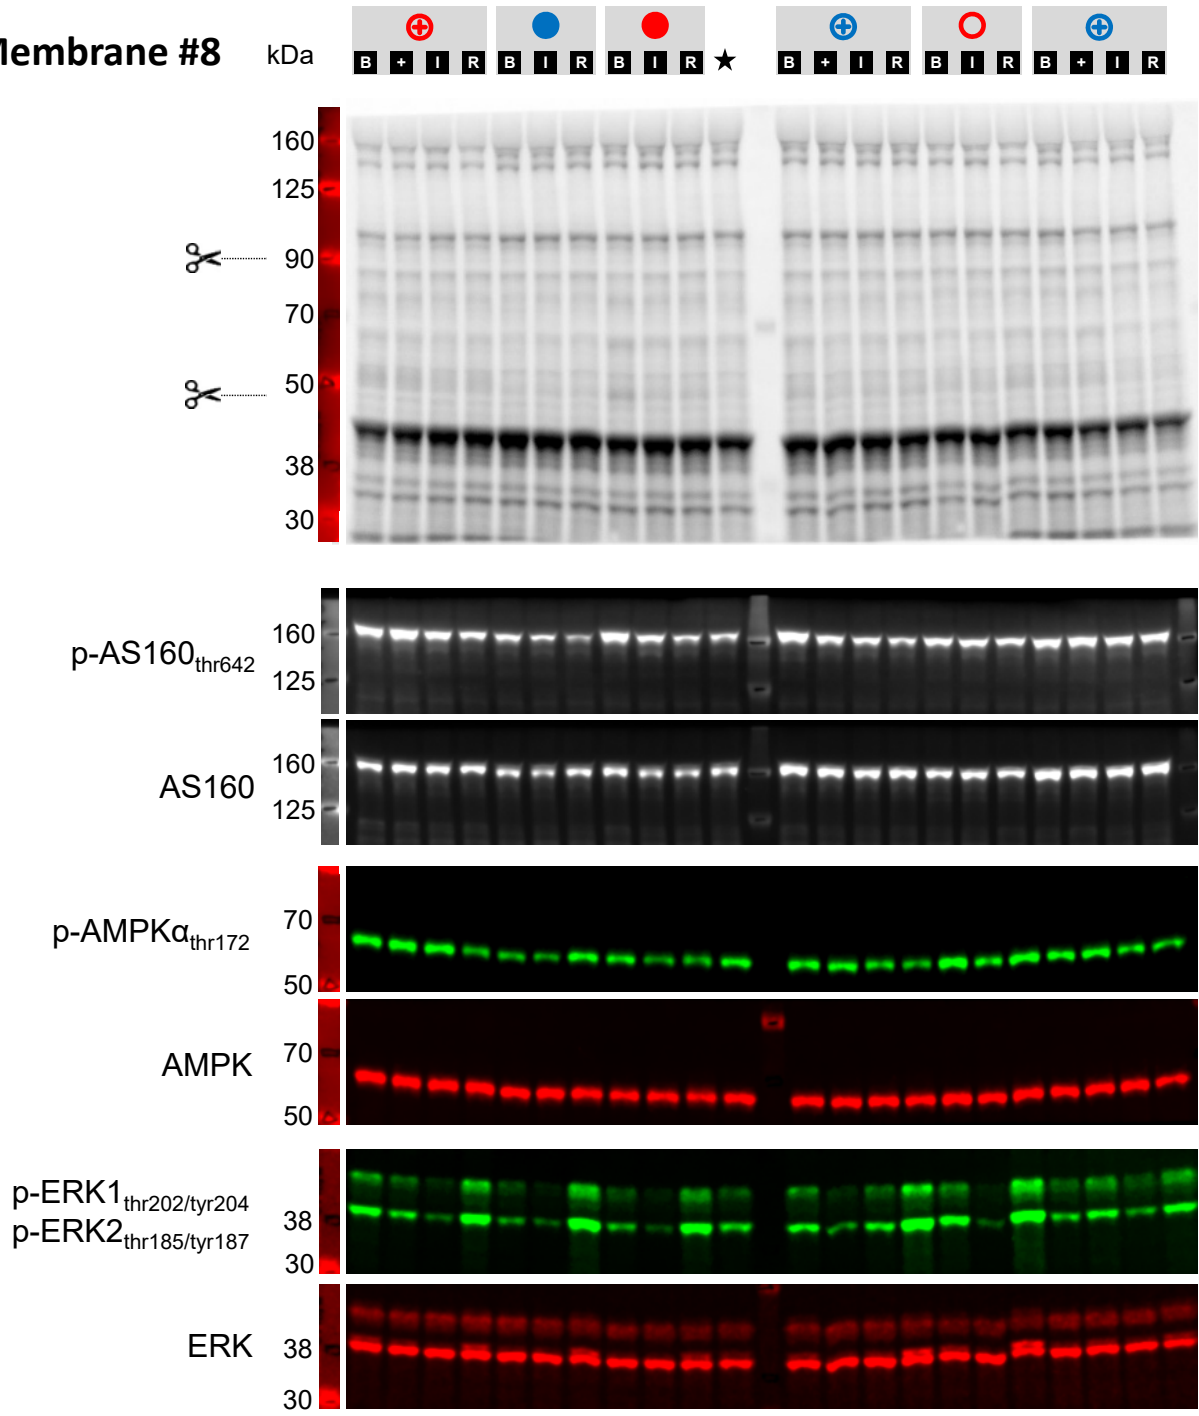



Membrane #9

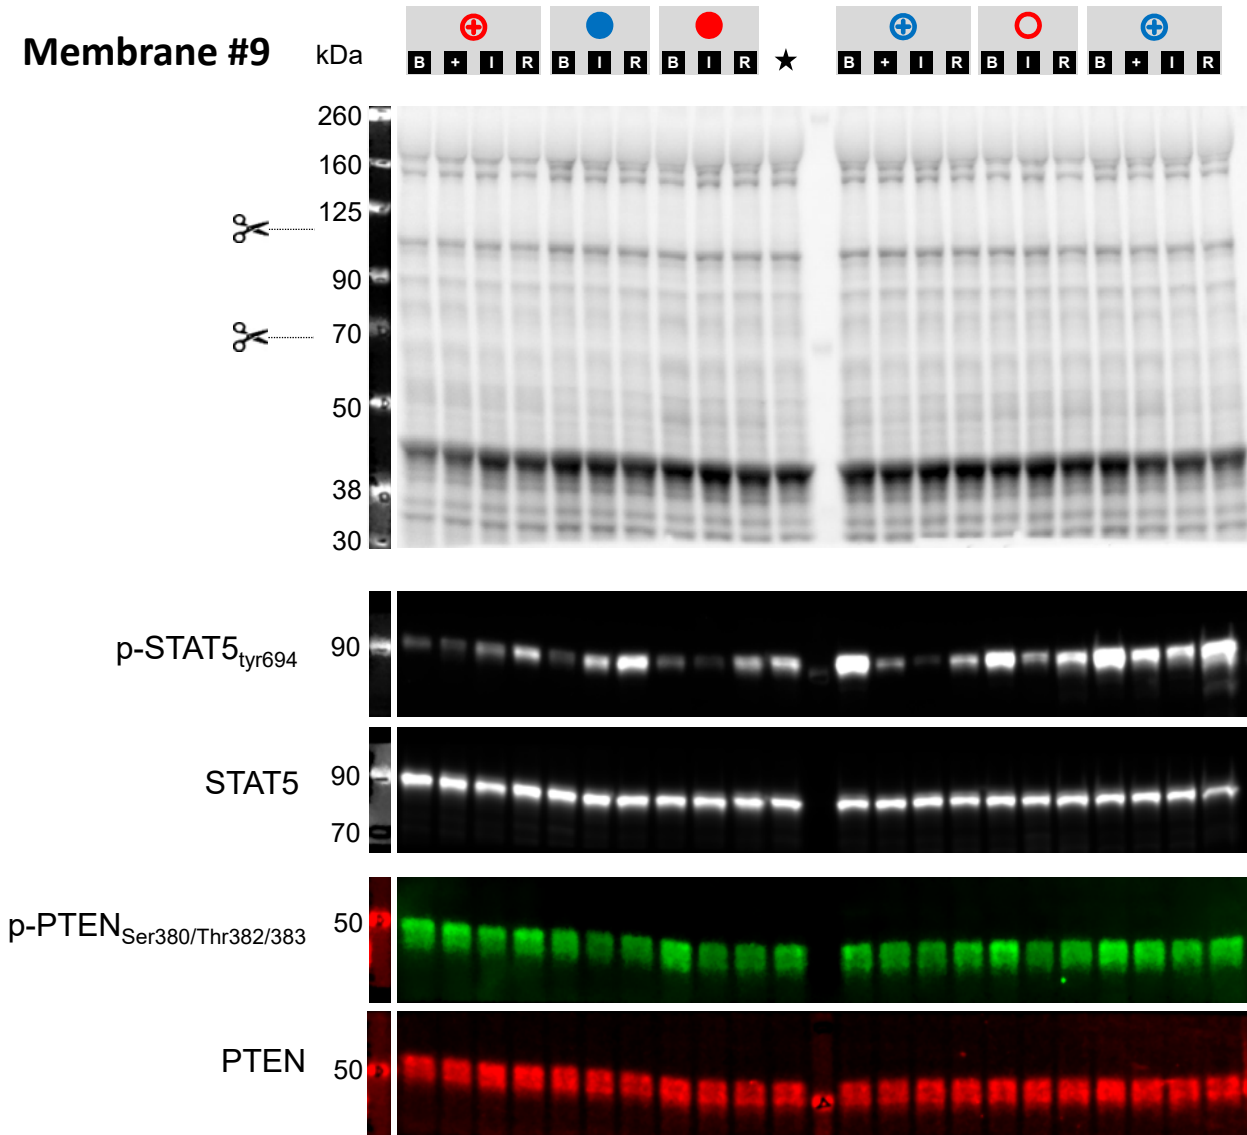

Membrane #10

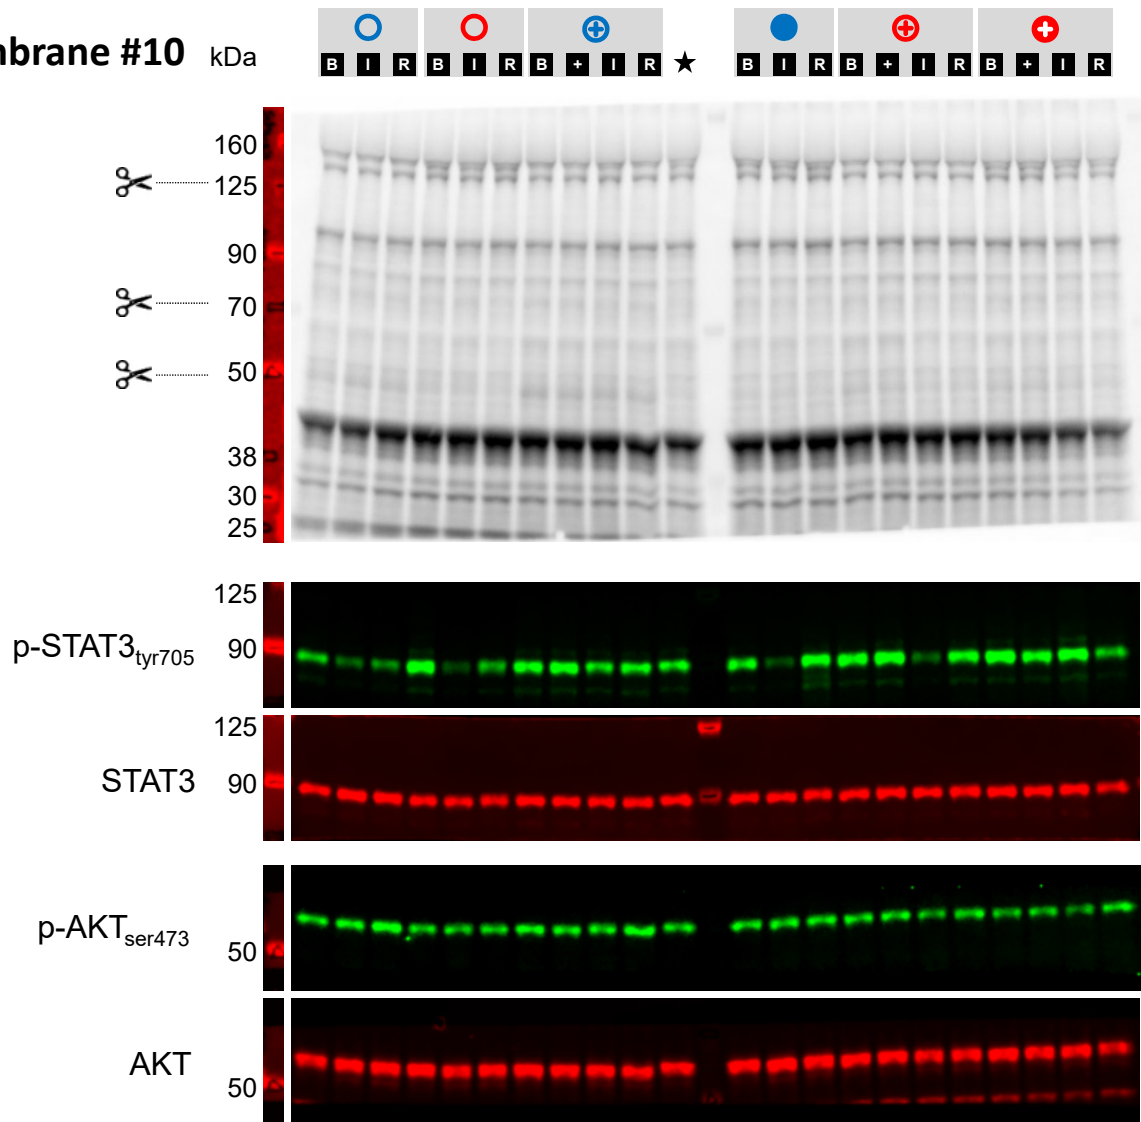

**Membrane #11**

kDa

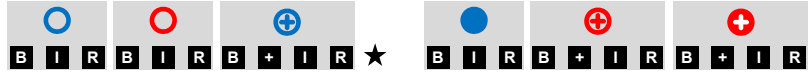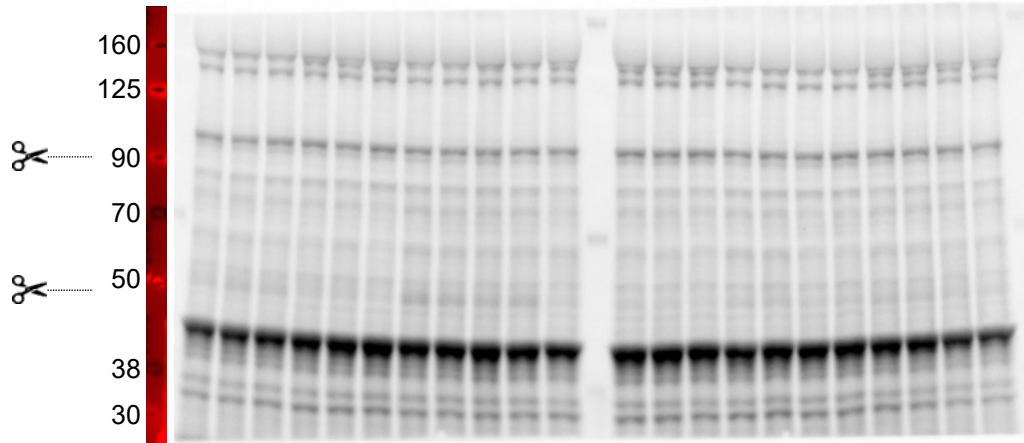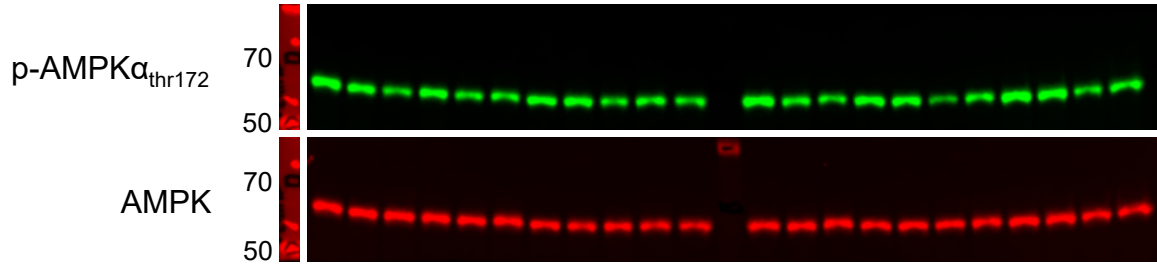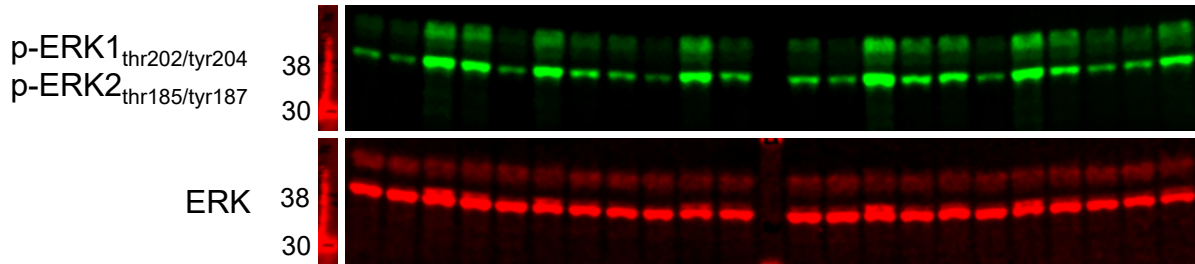

**Membrane #12**

kDa

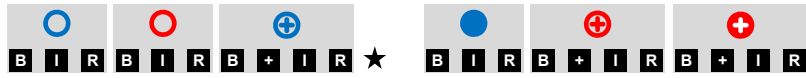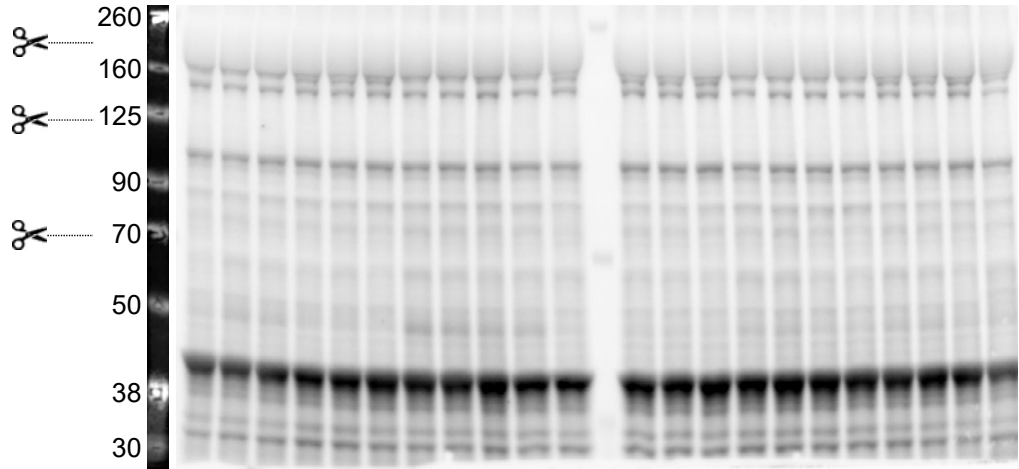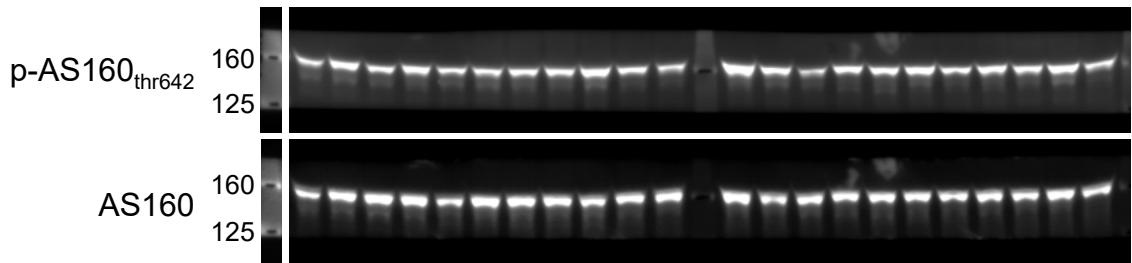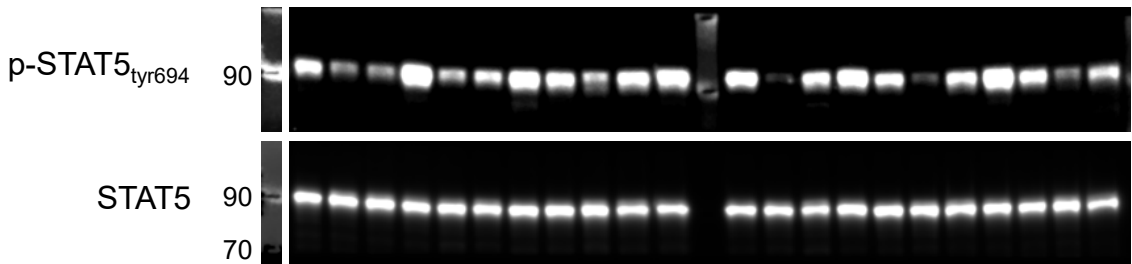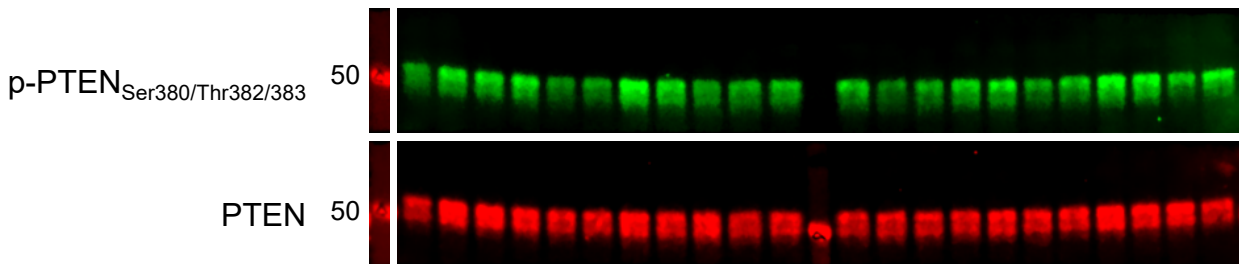

**Membrane #13**

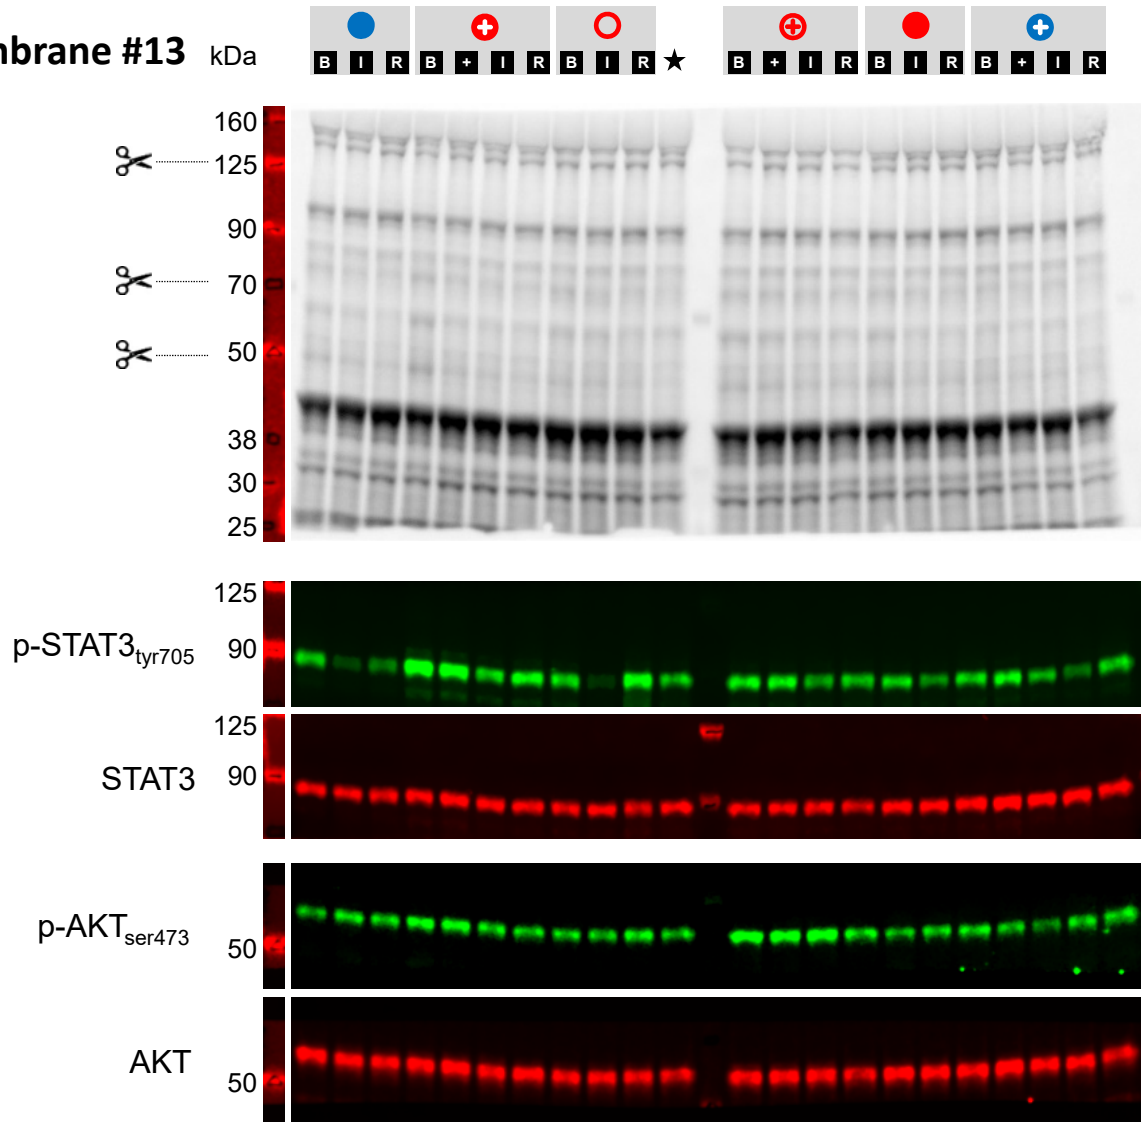

Membrane #14

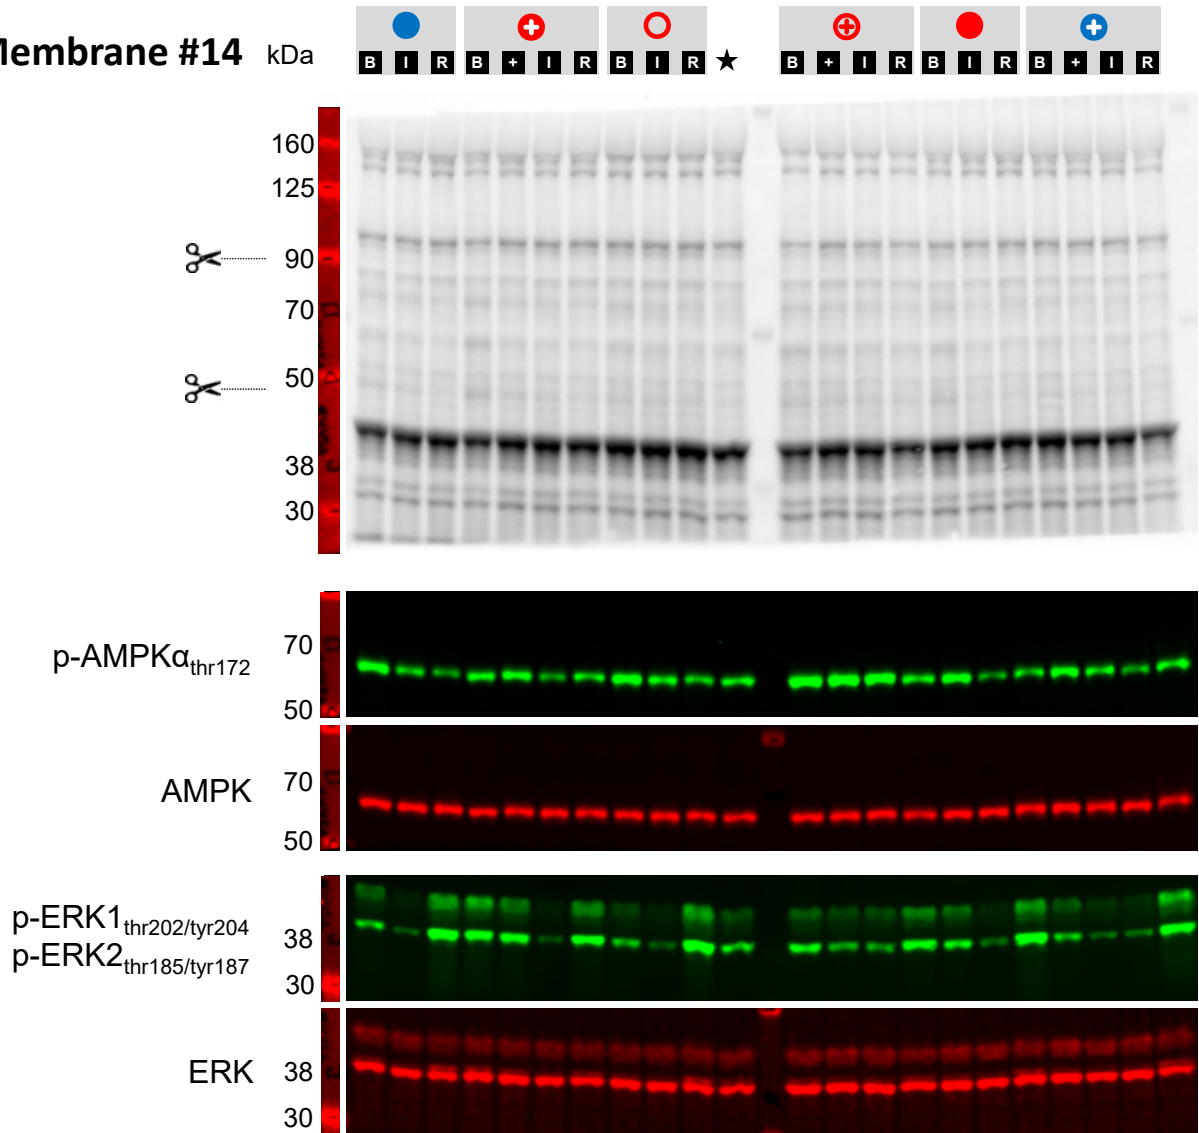

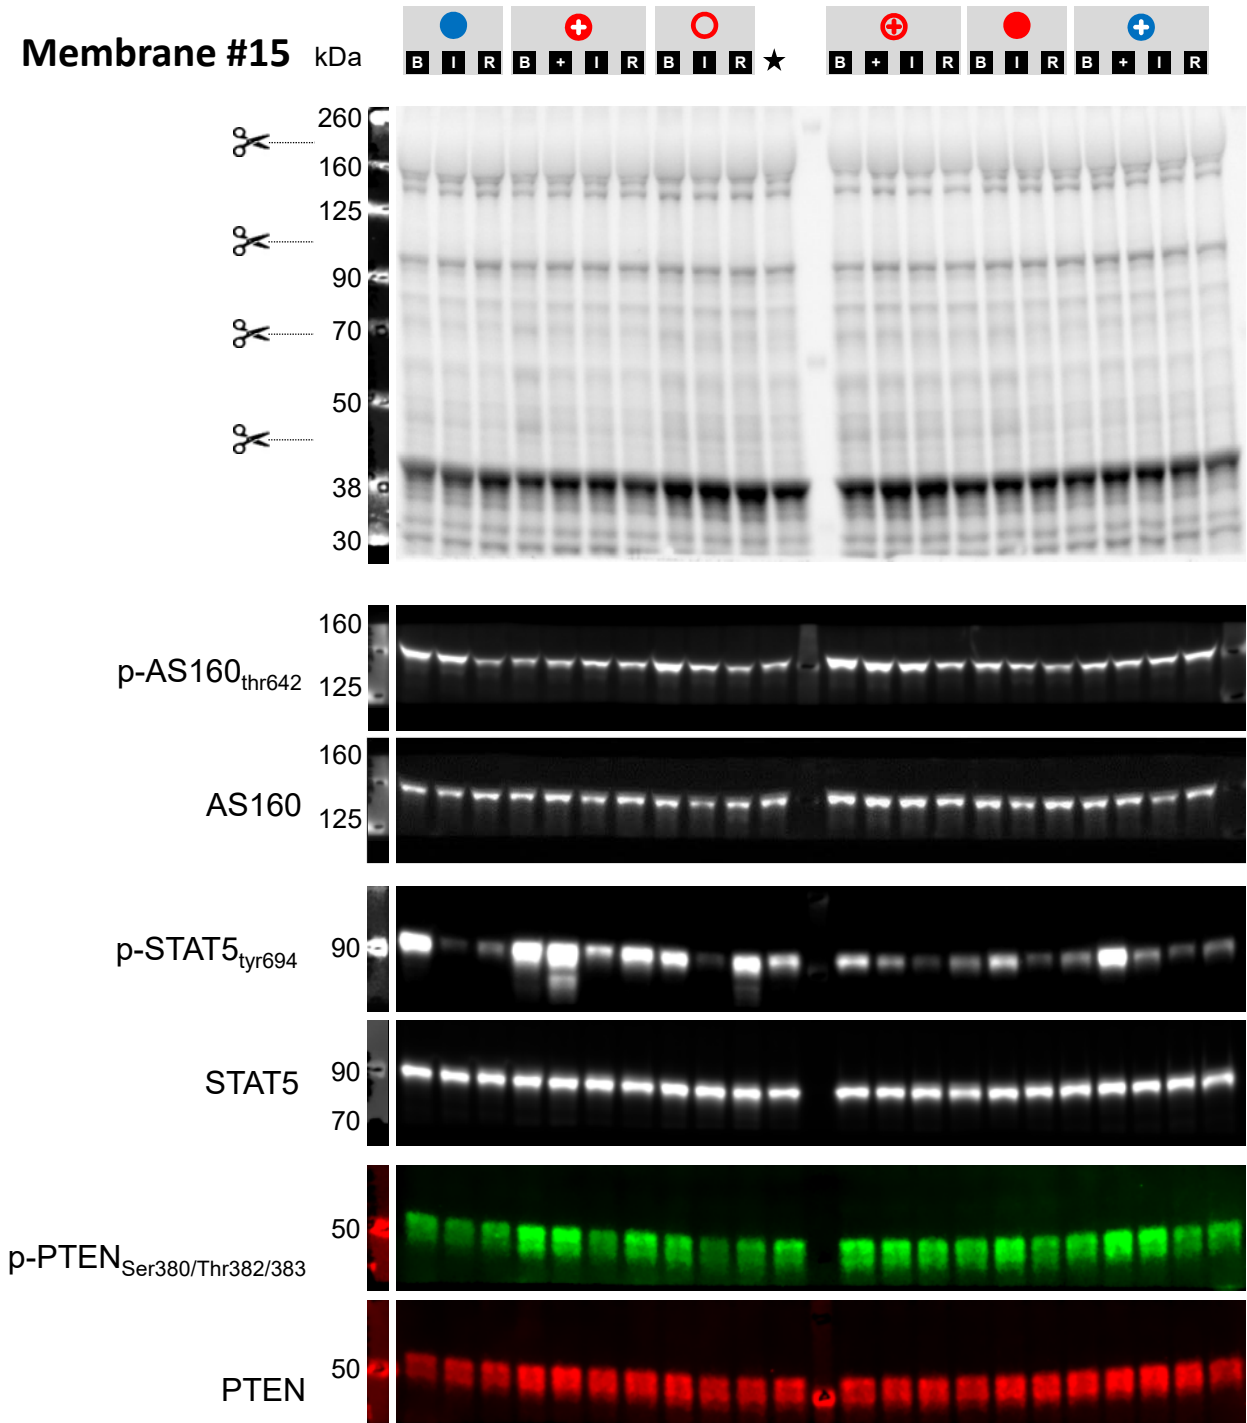

Membrane #16

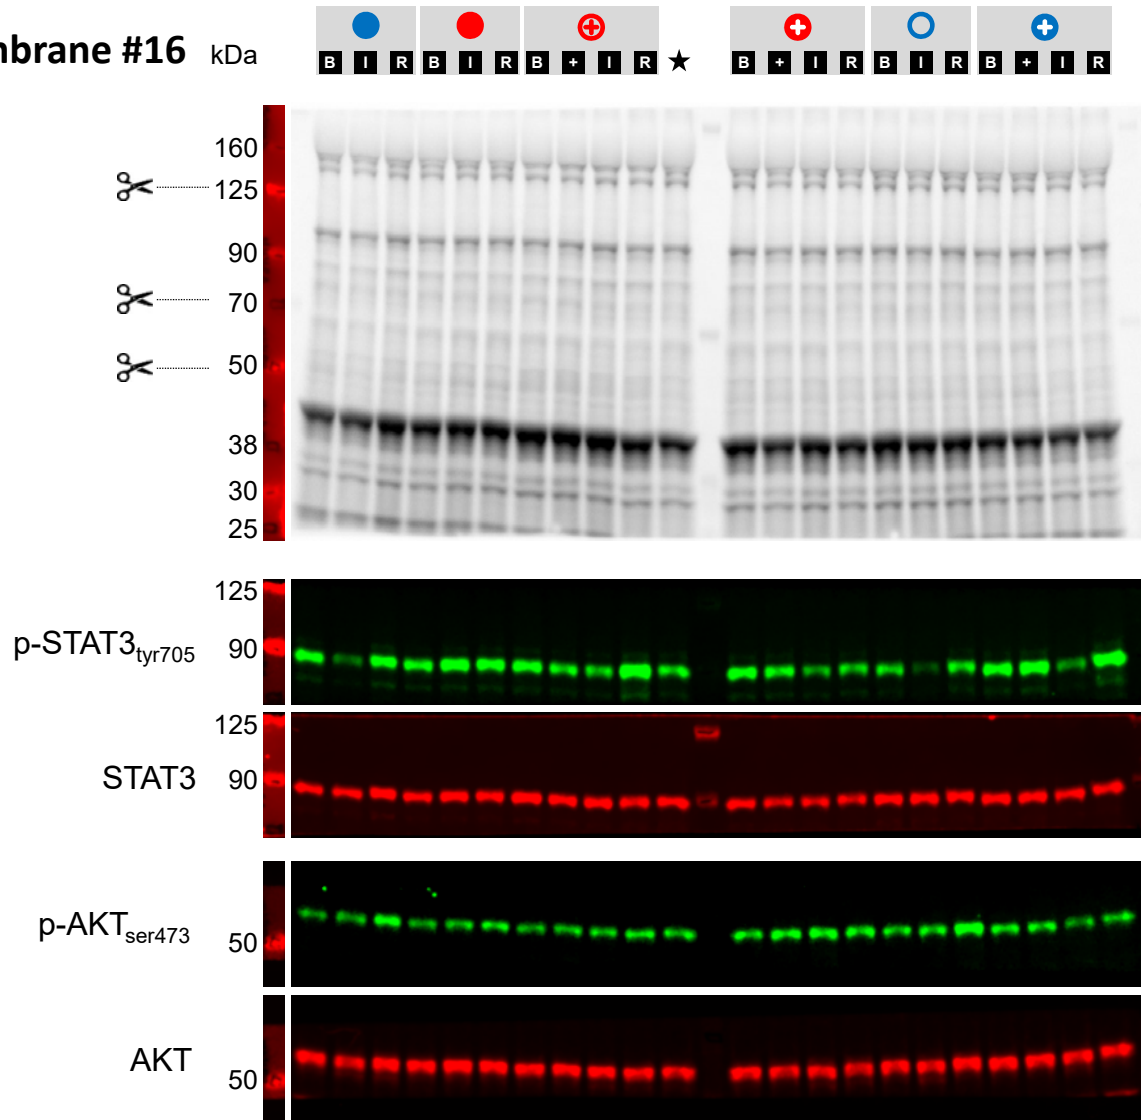





**Membrane #18**

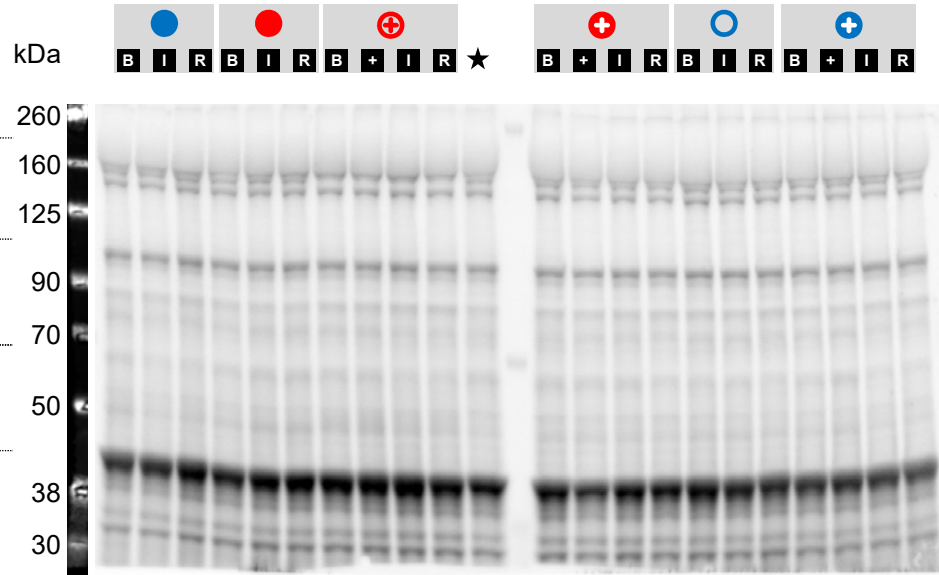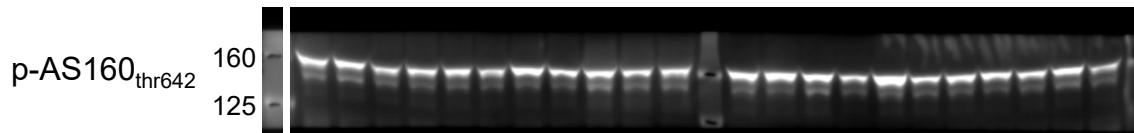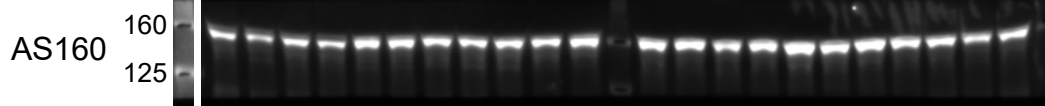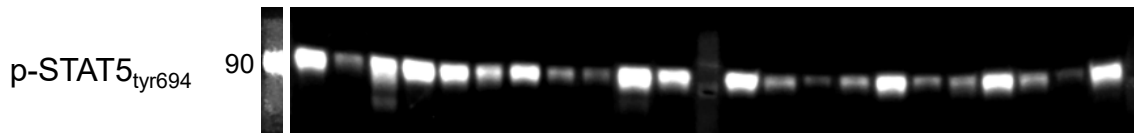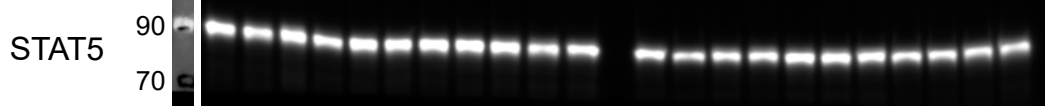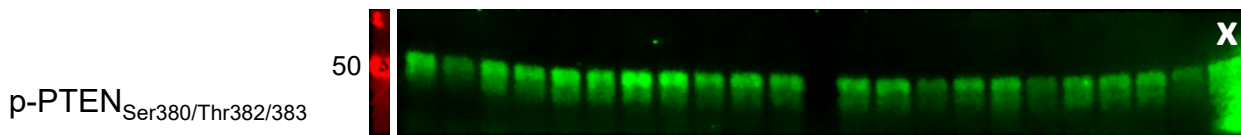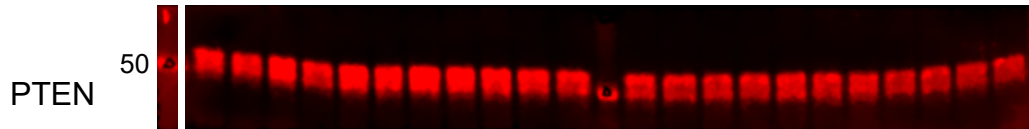

Membrane #19

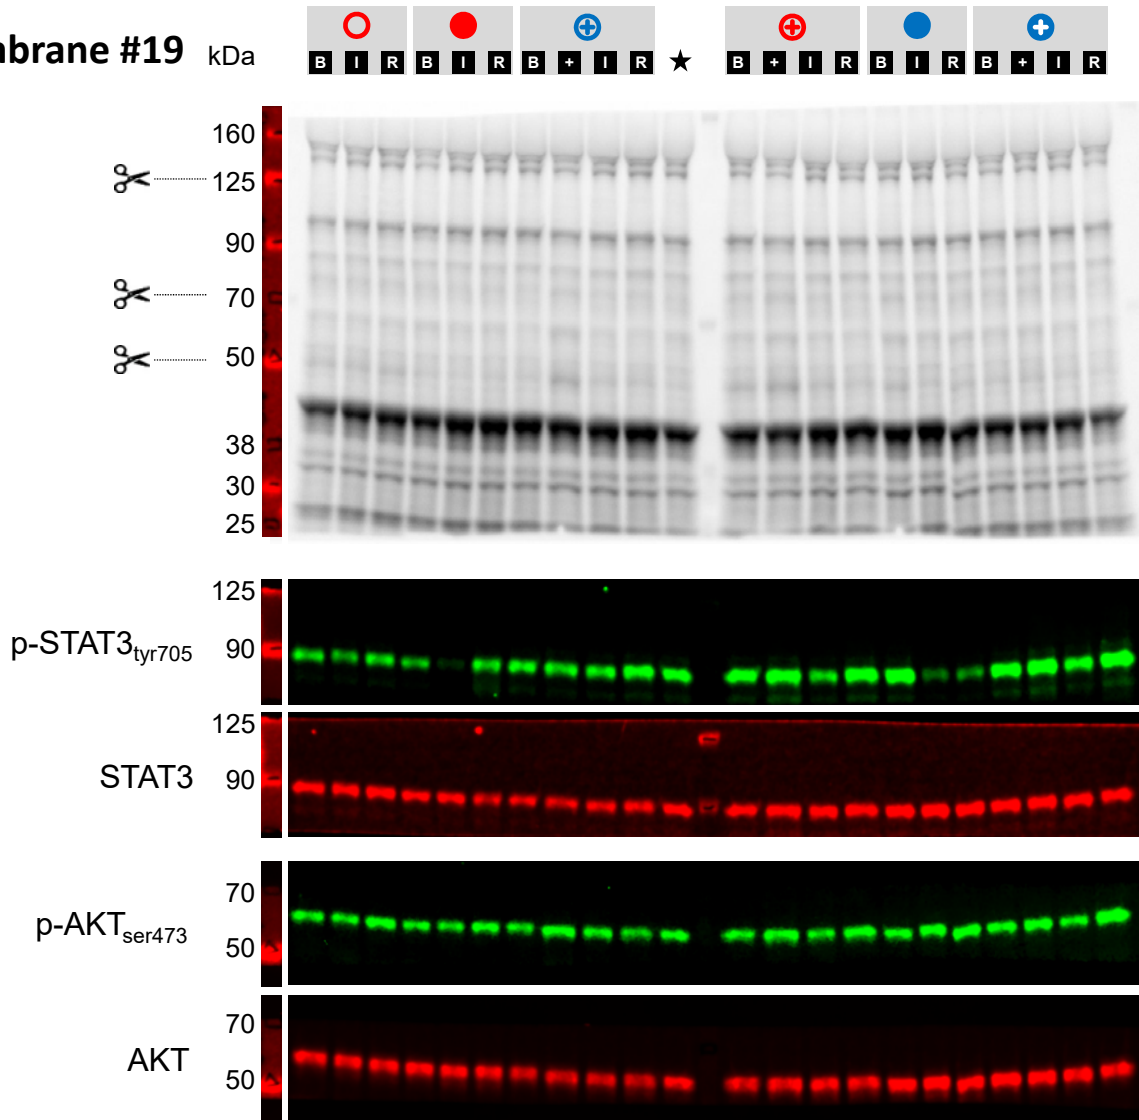

**Membrane #20**

kDa

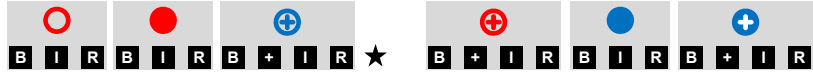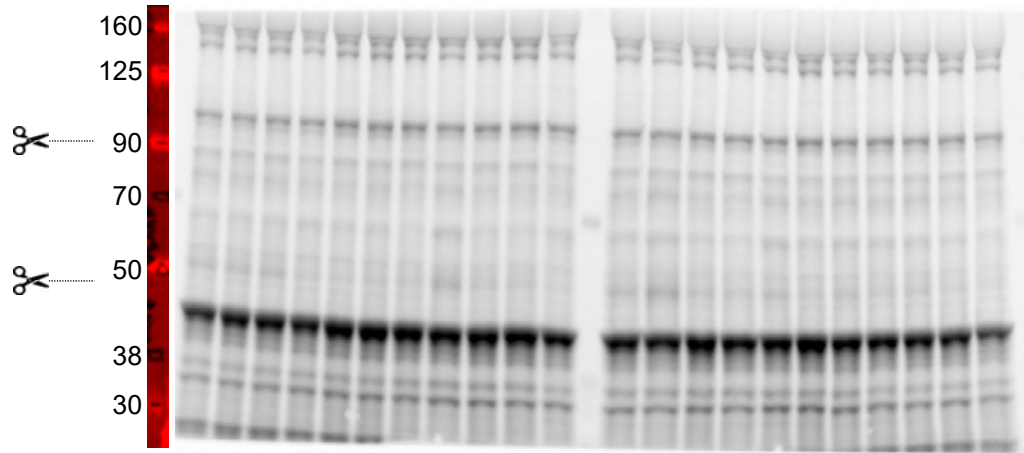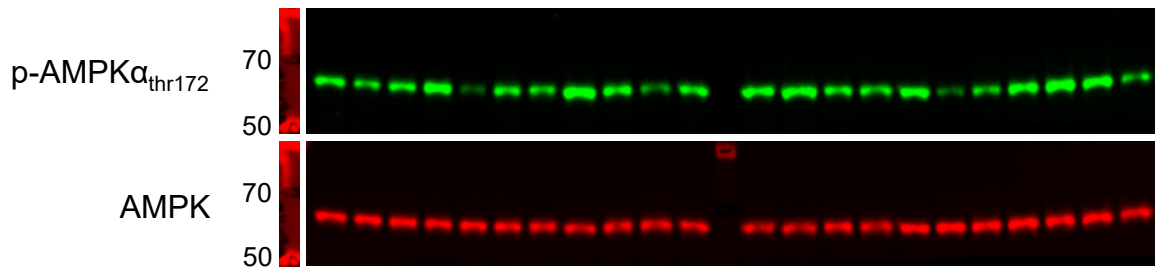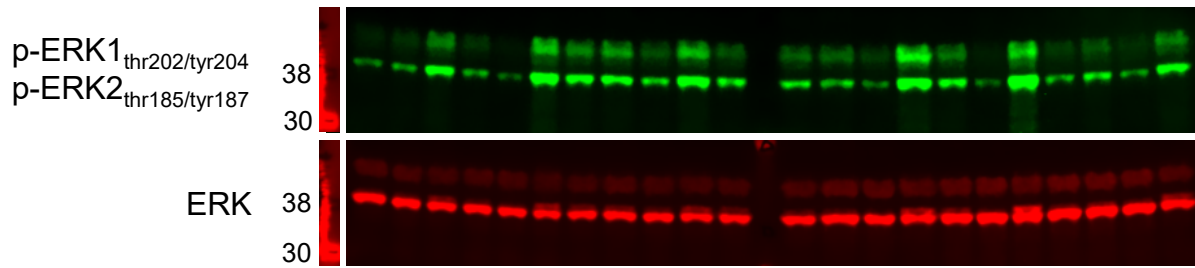

**Membrane #21**

kDa

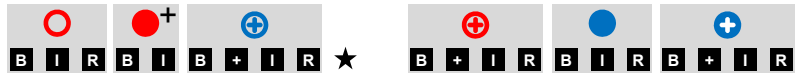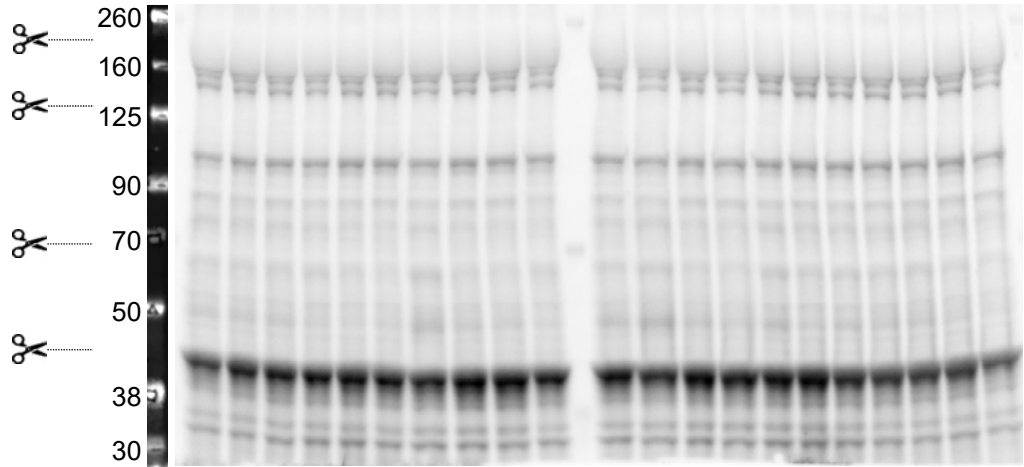

p-AS160<sub>thr642</sub>

160

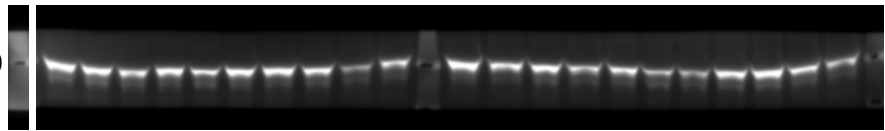

AS160

160

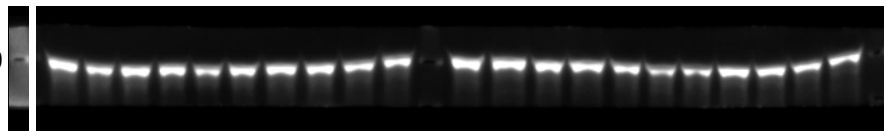

p-STAT5<sub>tyr694</sub>

90

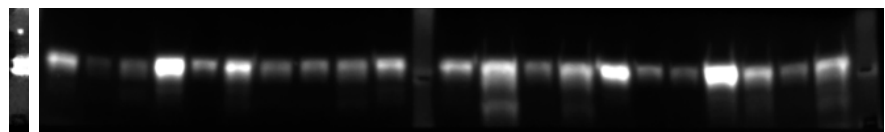

STAT5

90

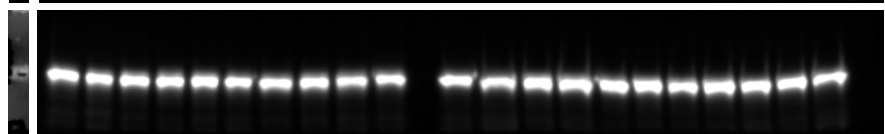

p-PTEN<sub>Ser380/Thr382/383</sub>

50

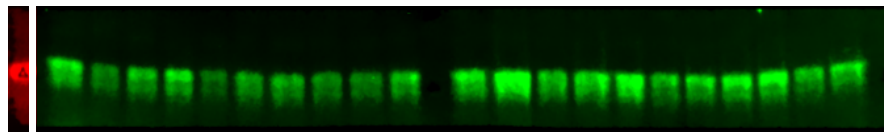

PTEN

50

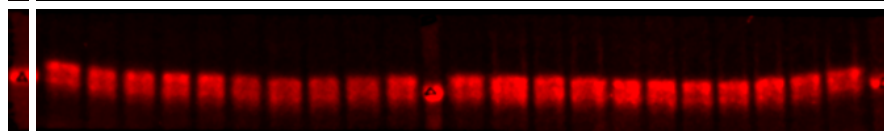

Membrane #22

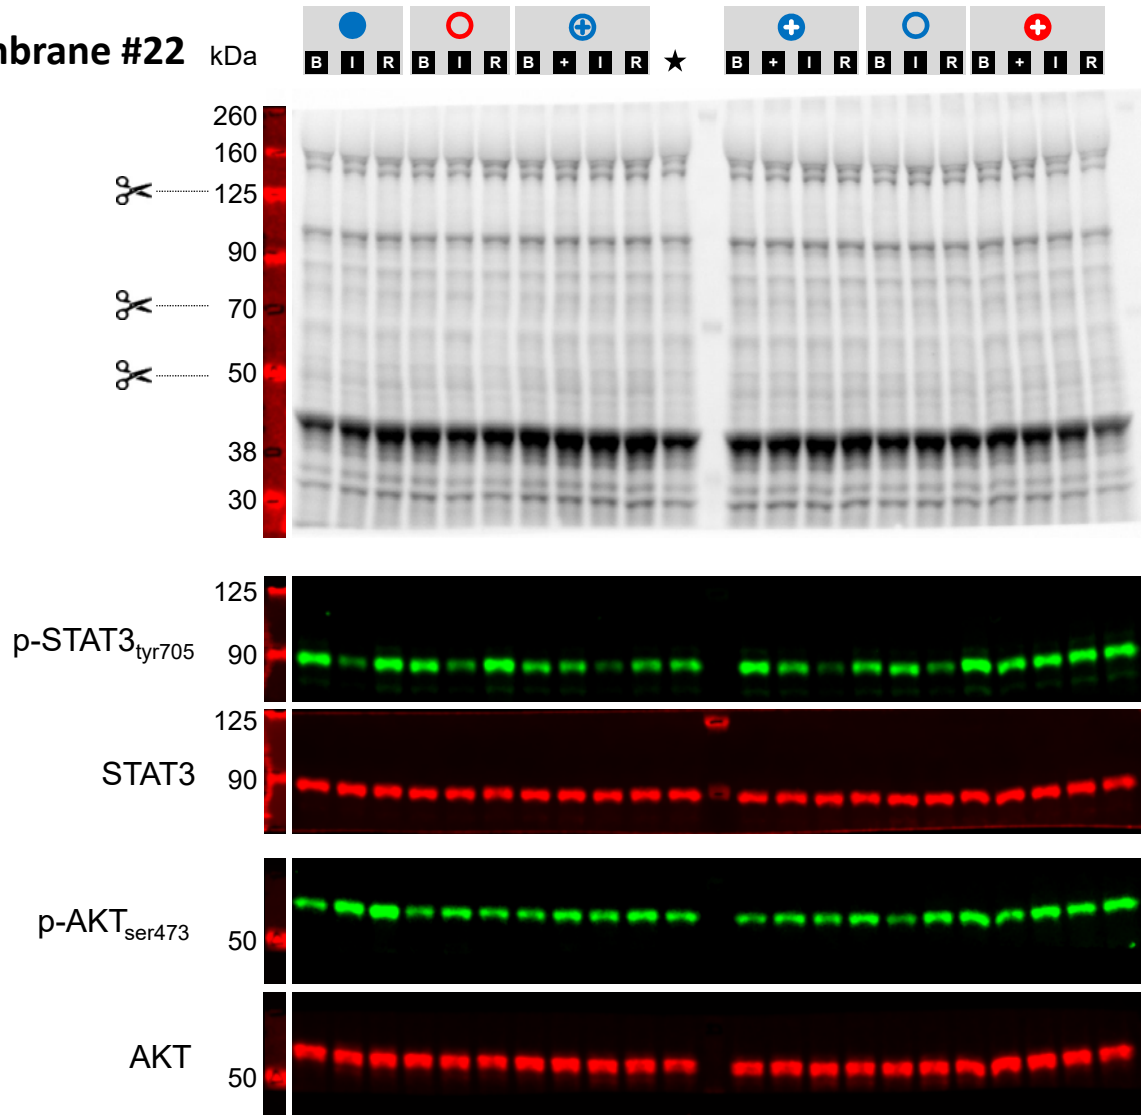

**Membrane #23**

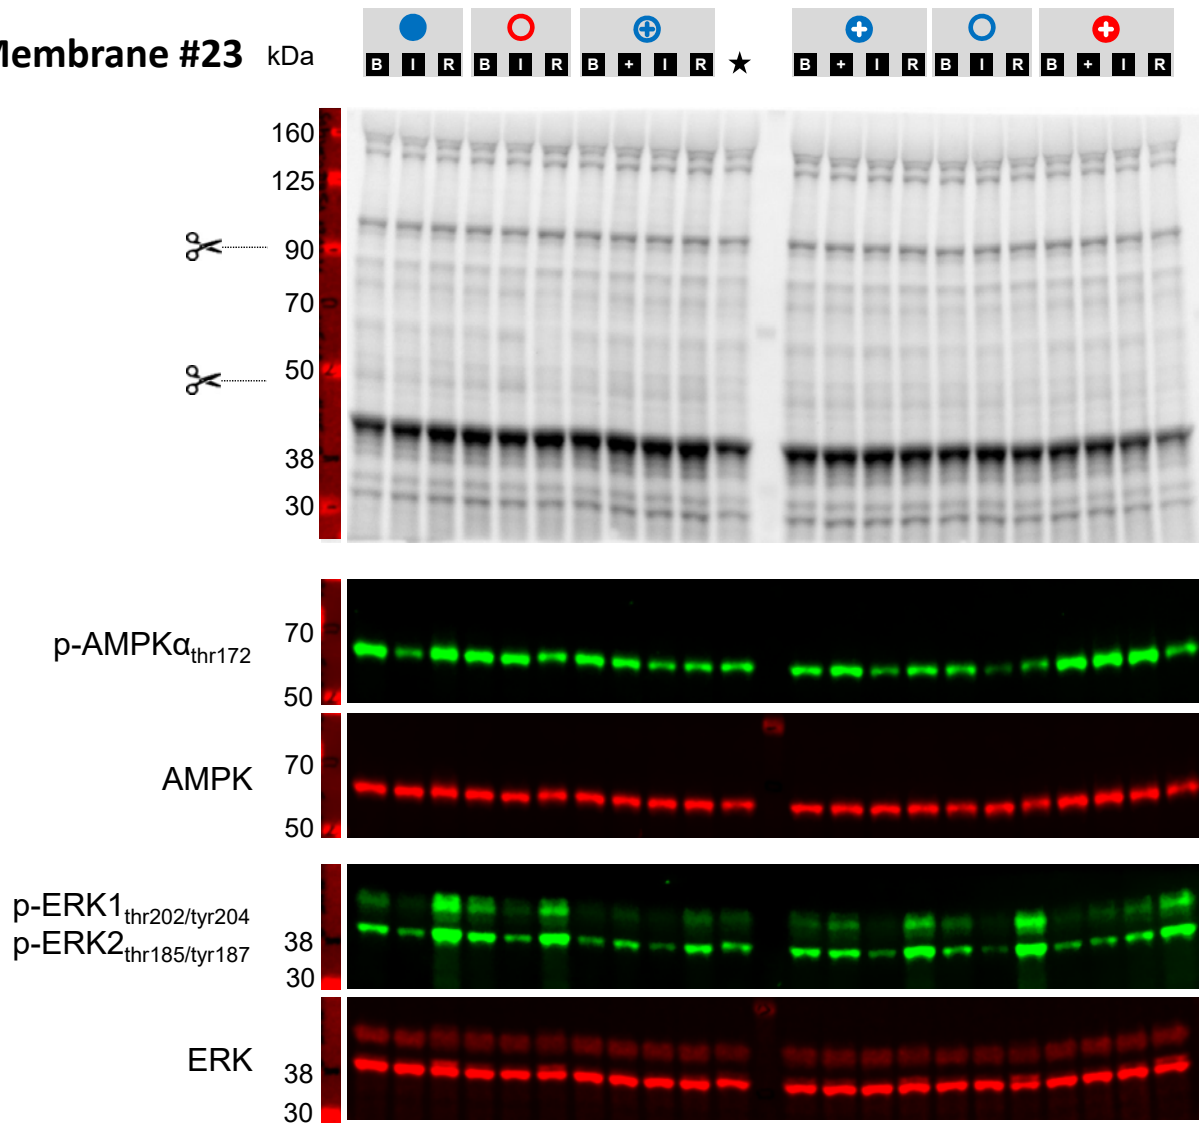

**Membrane #24**

kDa

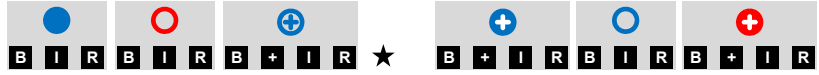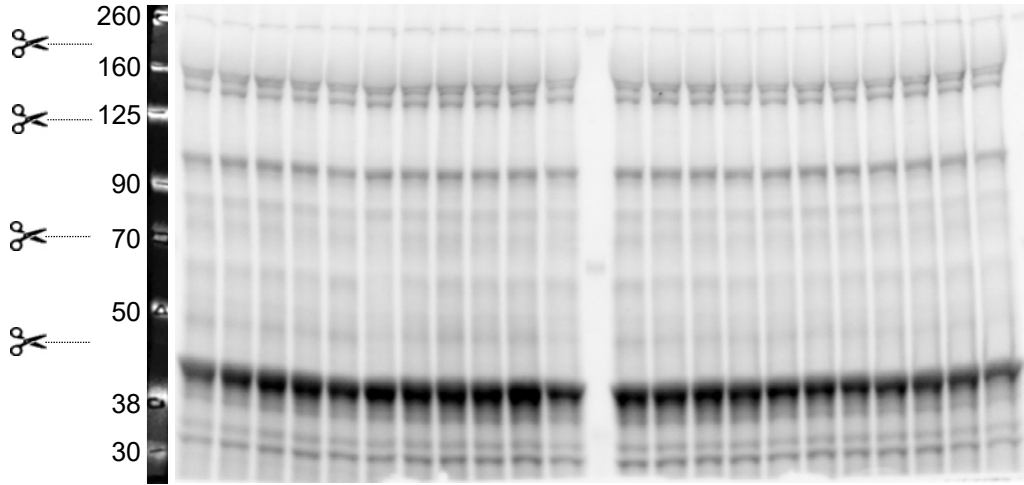

p-AS160<sub>thr642</sub>

160  
125

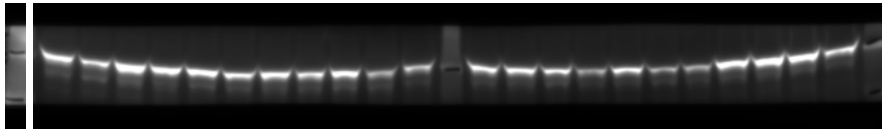

AS160

160  
125

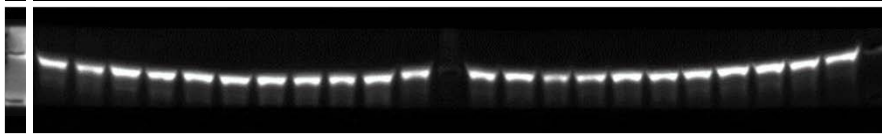

p-STAT5<sub>tyr694</sub>

90

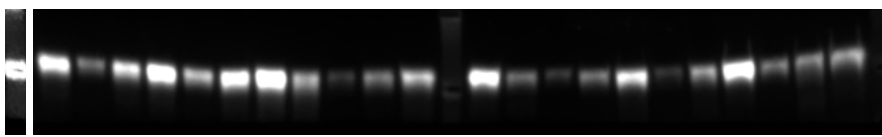

STAT5

90  
70

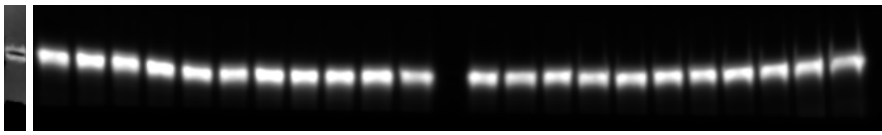

p-PTEN<sub>Ser380/Thr382/383</sub>

50

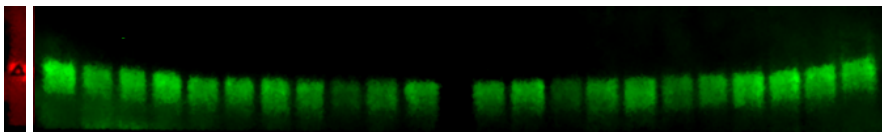

PTEN

50

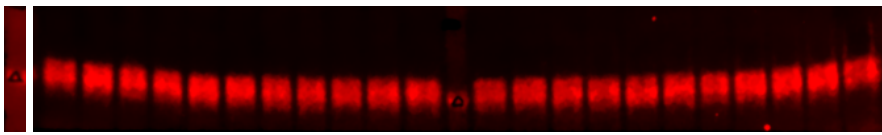



Membrane #25

kDa

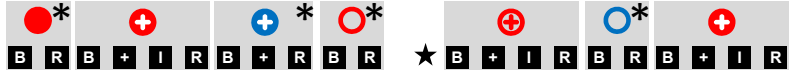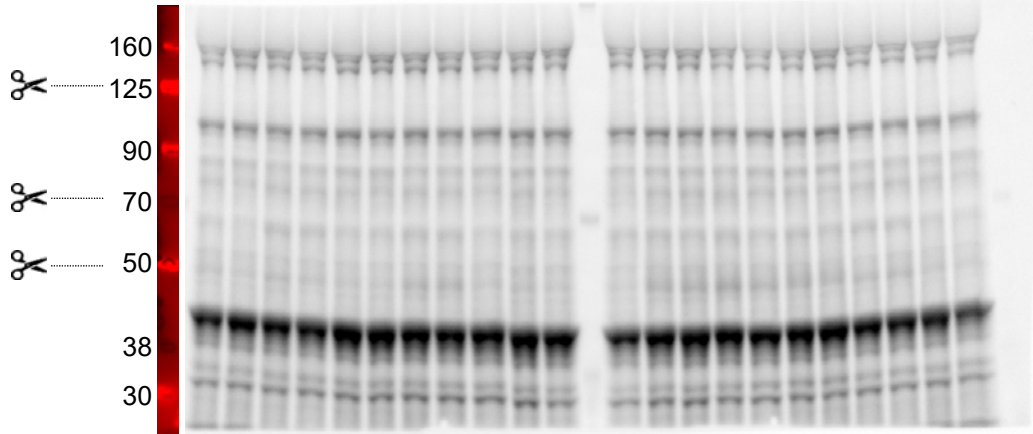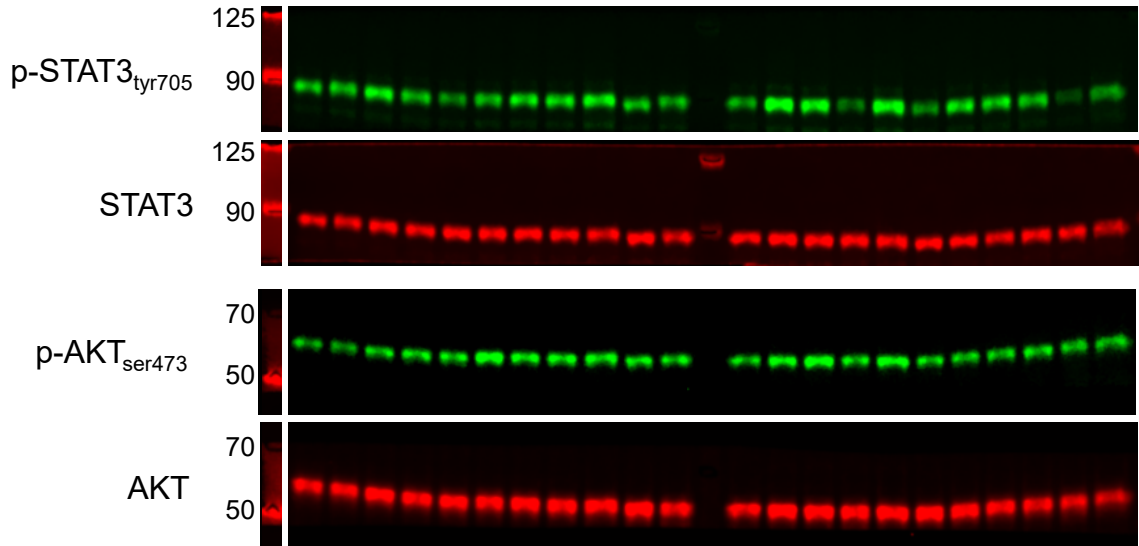





Membrane #28

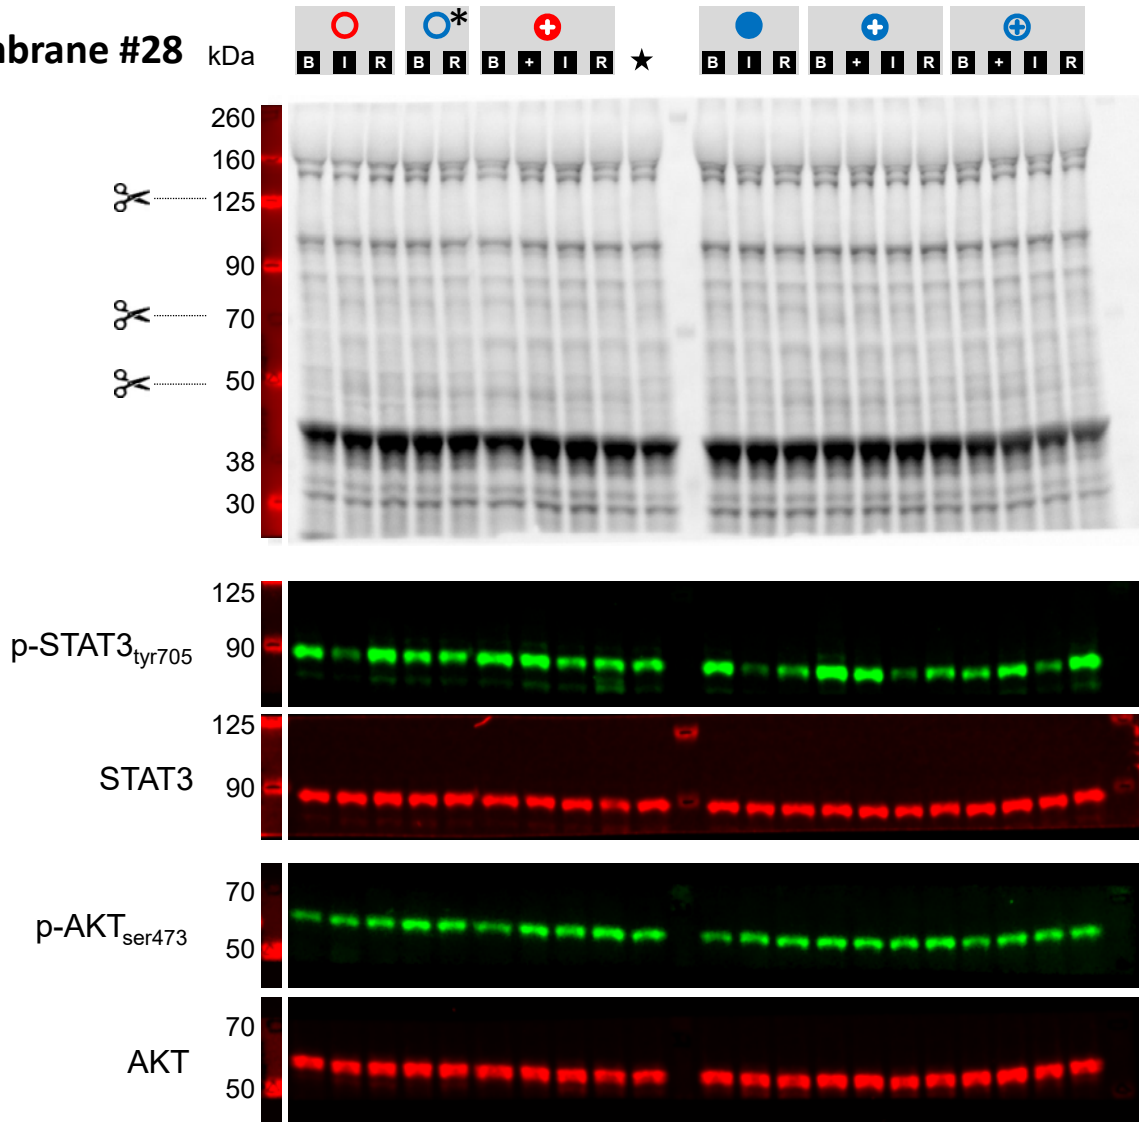

Membrane #29

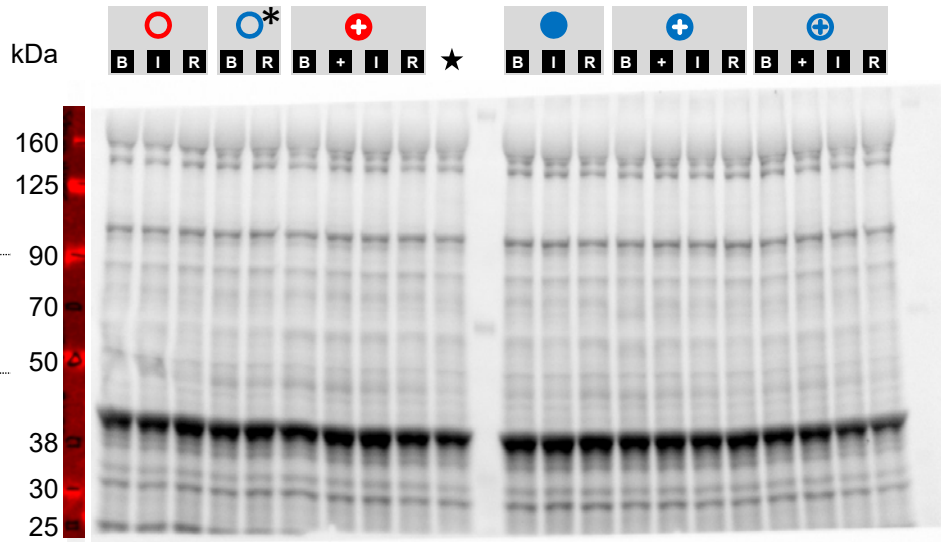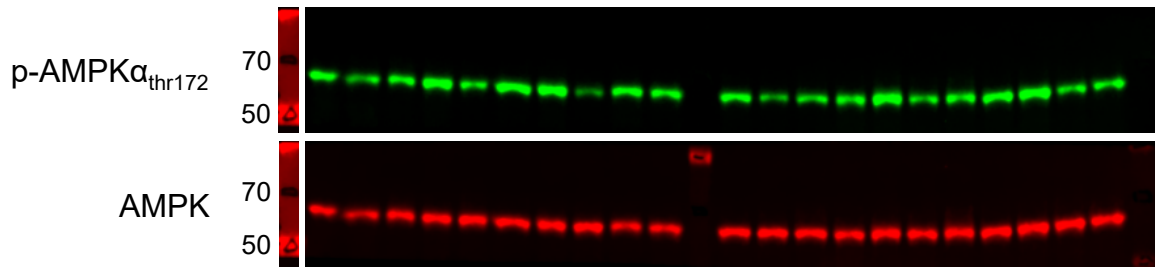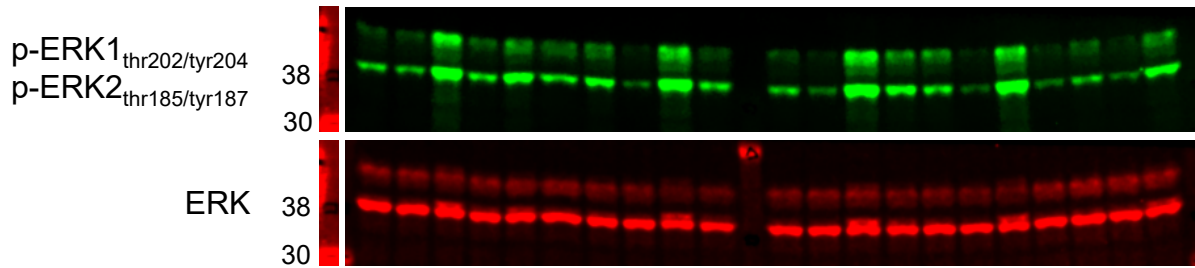

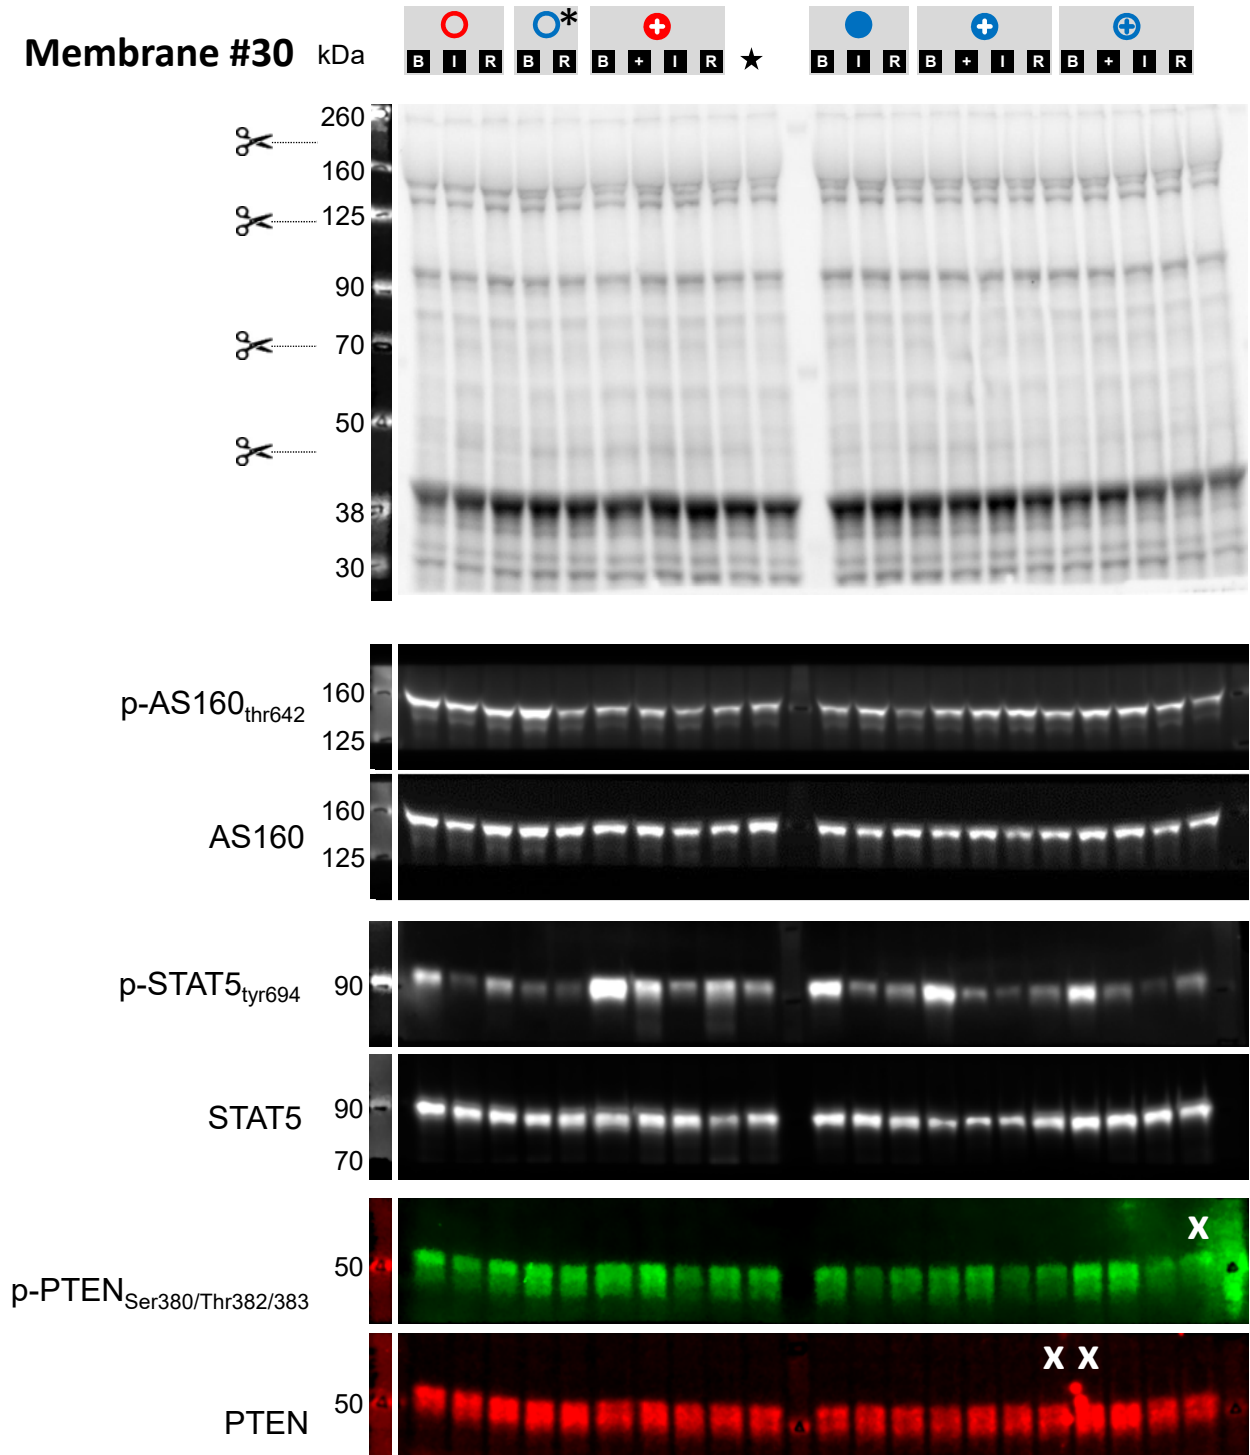

Supplement: MOESM1 [file 23702580]
